# Supplementary material for: The potential mechanism of Huangqin for treatment of systemic lupus erythematosus based on network pharmacology, molecular docking and molecular dynamics simulation
Source: PeerJ. 2025 Jun 26;13:e19536. doi: 10.7717/peerj.19536 (PMC12206403; doi:10.7717/peerj.19536)
Supplement: Supplemental Information 1 [file peerj-13-19536-s001.xlsx]

## Sheet: targetName
Supplementary Table S1 Information for potential targets of Huangqin components
MolId	Name	Target
MOL001689	acacetin	Nitric oxide synthase, inducible
MOL001689	acacetin	Prostaglandin G/H synthase 1
MOL001689	acacetin	Androgen receptor
MOL001689	acacetin	Prostaglandin G/H synthase 2
MOL001689	acacetin	Dipeptidyl peptidase IV
MOL001689	acacetin	Heat shock protein HSP 90
MOL001689	acacetin	Cell division protein kinase 2
MOL001689	acacetin	mRNA of PKA Catalytic Subunit C-alpha
MOL001689	acacetin	Trypsin-1
MOL001689	acacetin	Nuclear receptor coactivator 2
MOL001689	acacetin	Nuclear receptor coactivator 1
MOL001689	acacetin	Calmodulin
MOL001689	acacetin	Phosphatidylinositol-4,5-bisphosphate 3-kinase catalytic subunit, gamma isoform
MOL001689	acacetin	Serine/threonine-protein kinase Chk1
MOL001689	acacetin	Beta-2 adrenergic receptor
MOL001689	acacetin	CGMP-inhibited 3',5'-cyclic phosphodiesterase A
MOL001689	acacetin	Transcription factor p65
MOL001689	acacetin	Apoptosis regulator Bcl-2
MOL001689	acacetin	Cyclin-dependent kinase inhibitor 1
MOL001689	acacetin	Apoptosis regulator BAX
MOL001689	acacetin	Caspase-3
MOL001689	acacetin	Cellular tumor antigen p53
MOL001689	acacetin	Caspase-8
MOL001689	acacetin	Fatty acid synthase
MOL001689	acacetin	Tumor necrosis factor ligand superfamily member 6
MOL001689	acacetin	Cytochrome P450 19A1
MOL000173	wogonin	Nitric oxide synthase, inducible
MOL000173	wogonin	Prostaglandin G/H synthase 1
MOL000173	wogonin	Estrogen receptor
MOL000173	wogonin	Androgen receptor
MOL000173	wogonin	Sodium channel protein type 5 subunit alpha
MOL000173	wogonin	Peroxisome proliferator activated receptor gamma
MOL000173	wogonin	Prostaglandin G/H synthase 2
MOL000173	wogonin	Retinoic acid receptor RXR-alpha
MOL000173	wogonin	CGMP-inhibited 3',5'-cyclic phosphodiesterase A
MOL000173	wogonin	Dipeptidyl peptidase IV
MOL000173	wogonin	Mitogen-activated protein kinase 14
MOL000173	wogonin	Glycogen synthase kinase-3 beta
MOL000173	wogonin	Heat shock protein HSP 90
MOL000173	wogonin	Cell division protein kinase 2
MOL000173	wogonin	Phosphatidylinositol-4,5-bisphosphate 3-kinase catalytic subunit, gamma isoform
MOL000173	wogonin	Serine/threonine-protein kinase Chk1
MOL000173	wogonin	mRNA of PKA Catalytic Subunit C-alpha
MOL000173	wogonin	Trypsin-1
MOL000173	wogonin	Calmodulin
MOL000173	wogonin	Beta-2 adrenergic receptor
MOL000173	wogonin	Gamma-aminobutyric acid receptor subunit alpha-1
MOL000173	wogonin	Transcription factor p65
MOL000173	wogonin	RAC-alpha serine/threonine-protein kinase
MOL000173	wogonin	G1/S-specific cyclin-D1
MOL000173	wogonin	Apoptosis regulator Bcl-2
MOL000173	wogonin	Cyclin-dependent kinase inhibitor 1
MOL000173	wogonin	Eukaryotic translation initiation factor 6
MOL000173	wogonin	Apoptosis regulator BAX
MOL000173	wogonin	Caspase-9
MOL000173	wogonin	Vascular endothelial growth factor receptor 2
MOL000173	wogonin	Tumor necrosis factor
MOL000173	wogonin	Transcription factor AP-1
MOL000173	wogonin	Interleukin-6
MOL000173	wogonin	Activator of 90 kDa heat shock protein ATPase homolog 1
MOL000173	wogonin	Caspase-3
MOL000173	wogonin	Cellular tumor antigen p53
MOL000173	wogonin	Bcl-2-binding component 3
MOL000173	wogonin	Telomerase protein component 1
MOL000173	wogonin	Interstitial collagenase
MOL000173	wogonin	C-C motif chemokine 2
MOL000173	wogonin	Protein kinase C delta type
MOL000173	wogonin	Prostaglandin E2 receptor EP3 subtype
MOL000173	wogonin	Fibronectin
MOL000173	wogonin	Interleukin-8
MOL000173	wogonin	Induced myeloid leukemia cell differentiation protein Mcl-1
MOL000228	(2R)-7-hydroxy-5-methoxy-2-phenylchroman-4-one	Prostaglandin G/H synthase 1
MOL000228	(2R)-7-hydroxy-5-methoxy-2-phenylchroman-4-one	Dopamine D1 receptor
MOL000228	(2R)-7-hydroxy-5-methoxy-2-phenylchroman-4-one	Muscarinic acetylcholine receptor M3
MOL000228	(2R)-7-hydroxy-5-methoxy-2-phenylchroman-4-one	Muscarinic acetylcholine receptor M1
MOL000228	(2R)-7-hydroxy-5-methoxy-2-phenylchroman-4-one	Estrogen receptor
MOL000228	(2R)-7-hydroxy-5-methoxy-2-phenylchroman-4-one	Sodium channel protein type 5 subunit alpha
MOL000228	(2R)-7-hydroxy-5-methoxy-2-phenylchroman-4-one	Prostaglandin G/H synthase 2
MOL000228	(2R)-7-hydroxy-5-methoxy-2-phenylchroman-4-one	Retinoic acid receptor RXR-alpha
MOL000228	(2R)-7-hydroxy-5-methoxy-2-phenylchroman-4-one	CGMP-inhibited 3',5'-cyclic phosphodiesterase A
MOL000228	(2R)-7-hydroxy-5-methoxy-2-phenylchroman-4-one	Alpha-1A adrenergic receptor
MOL000228	(2R)-7-hydroxy-5-methoxy-2-phenylchroman-4-one	Alpha-1B adrenergic receptor
MOL000228	(2R)-7-hydroxy-5-methoxy-2-phenylchroman-4-one	Sodium-dependent dopamine transporter
MOL000228	(2R)-7-hydroxy-5-methoxy-2-phenylchroman-4-one	Beta-2 adrenergic receptor
MOL000228	(2R)-7-hydroxy-5-methoxy-2-phenylchroman-4-one	Sodium-dependent serotonin transporter
MOL000228	(2R)-7-hydroxy-5-methoxy-2-phenylchroman-4-one	Gamma-aminobutyric acid receptor subunit alpha-1
MOL000228	(2R)-7-hydroxy-5-methoxy-2-phenylchroman-4-one	Heat shock protein HSP 90
MOL000228	(2R)-7-hydroxy-5-methoxy-2-phenylchroman-4-one	Phosphatidylinositol-4,5-bisphosphate 3-kinase catalytic subunit, gamma isoform
MOL000228	(2R)-7-hydroxy-5-methoxy-2-phenylchroman-4-one	mRNA of PKA Catalytic Subunit C-alpha
MOL000228	(2R)-7-hydroxy-5-methoxy-2-phenylchroman-4-one	cAMP-dependent protein kinase inhibitor alpha
MOL000228	(2R)-7-hydroxy-5-methoxy-2-phenylchroman-4-one	Neuronal acetylcholine receptor protein, alpha-7 chain
MOL000228	(2R)-7-hydroxy-5-methoxy-2-phenylchroman-4-one	Amine oxidase [flavin-containing] B
MOL000228	(2R)-7-hydroxy-5-methoxy-2-phenylchroman-4-one	Calmodulin
MOL002714	baicalein	Androgen receptor
MOL002714	baicalein	Prostaglandin G/H synthase 2
MOL002714	baicalein	Heat shock protein HSP 90
MOL002714	baicalein	mRNA of PKA Catalytic Subunit C-alpha
MOL002714	baicalein	Dipeptidyl peptidase IV
MOL002714	baicalein	Phosphatidylinositol-4,5-bisphosphate 3-kinase catalytic subunit, gamma isoform
MOL002714	baicalein	CGMP-inhibited 3',5'-cyclic phosphodiesterase A
MOL002714	baicalein	Trypsin-1
MOL002714	baicalein	Nuclear receptor coactivator 2
MOL002714	baicalein	Nuclear receptor coactivator 1
MOL002714	baicalein	Calmodulin
MOL002714	baicalein	Transcription factor p65
MOL002714	baicalein	RAC-alpha serine/threonine-protein kinase
MOL002714	baicalein	Vascular endothelial growth factor A
MOL002714	baicalein	Apoptosis regulator Bcl-2
MOL002714	baicalein	Proto-oncogene c-Fos
MOL002714	baicalein	Apoptosis regulator BAX
MOL002714	baicalein	Matrix metalloproteinase-9
MOL002714	baicalein	Caspase-3
MOL002714	baicalein	Cellular tumor antigen p53
MOL002714	baicalein	Hypoxia-inducible factor 1-alpha
MOL002714	baicalein	Fos-related antigen 1
MOL002714	baicalein	Fos-related antigen 2
MOL002714	baicalein	Cell division control protein 2 homolog
MOL002714	baicalein	G2/mitotic-specific cyclin-B1
MOL002714	baicalein	Myeloperoxidase
MOL002714	baicalein	Aryl hydrocarbon receptor
MOL002714	baicalein	Insulin-like growth factor II
MOL002714	baicalein	Cytochrome c
MOL002714	baicalein	Arachidonate 12-lipoxygenase, 12S-type
MOL002714	baicalein	Nuclear factor of activated T-cells, cytoplasmic 1
MOL002714	baicalein	Tudor domain-containing protein 7
MOL002714	baicalein	Egl nine homolog 1
MOL002714	baicalein	NADPH oxidase 5
MOL002714	baicalein	Fatty acid-binding protein, epidermal
MOL002714	baicalein	Apolipoprotein D
MOL002909	5,7,2,5-tetrahydroxy-8,6-dimethoxyflavone	Nitric oxide synthase, inducible
MOL002909	5,7,2,5-tetrahydroxy-8,6-dimethoxyflavone	Thrombin
MOL002909	5,7,2,5-tetrahydroxy-8,6-dimethoxyflavone	Androgen receptor
MOL002909	5,7,2,5-tetrahydroxy-8,6-dimethoxyflavone	Coagulation factor Xa
MOL002909	5,7,2,5-tetrahydroxy-8,6-dimethoxyflavone	Prostaglandin G/H synthase 2
MOL002909	5,7,2,5-tetrahydroxy-8,6-dimethoxyflavone	mRNA of Protein-tyrosine phosphatase, non-receptor type 1
MOL002909	5,7,2,5-tetrahydroxy-8,6-dimethoxyflavone	DNA topoisomerase II
MOL002909	5,7,2,5-tetrahydroxy-8,6-dimethoxyflavone	Dipeptidyl peptidase IV
MOL002909	5,7,2,5-tetrahydroxy-8,6-dimethoxyflavone	Glycogen phosphorylase, muscle form
MOL002909	5,7,2,5-tetrahydroxy-8,6-dimethoxyflavone	Heat shock protein HSP 90
MOL002909	5,7,2,5-tetrahydroxy-8,6-dimethoxyflavone	Trypsin-1
MOL002909	5,7,2,5-tetrahydroxy-8,6-dimethoxyflavone	Nuclear receptor coactivator 2
MOL002909	5,7,2,5-tetrahydroxy-8,6-dimethoxyflavone	Calcium-activated potassium channel subunit alpha 1
MOL002910	Carthamidin	Prostaglandin G/H synthase 1
MOL002910	Carthamidin	Prostaglandin G/H synthase 2
MOL002910	Carthamidin	Heat shock protein HSP 90
MOL002910	Carthamidin	mRNA of PKA Catalytic Subunit C-alpha
MOL002913	Dihydrobaicalin_qt	Prostaglandin G/H synthase 1
MOL002913	Dihydrobaicalin_qt	Prostaglandin G/H synthase 2
MOL002913	Dihydrobaicalin_qt	Heat shock protein HSP 90
MOL002913	Dihydrobaicalin_qt	mRNA of PKA Catalytic Subunit C-alpha
MOL002914	Eriodyctiol (flavanone)	Prostaglandin G/H synthase 1
MOL002914	Eriodyctiol (flavanone)	Prostaglandin G/H synthase 2
MOL002914	Eriodyctiol (flavanone)	Heat shock protein HSP 90
MOL002914	Eriodyctiol (flavanone)	mRNA of PKA Catalytic Subunit C-alpha
MOL002914	Eriodyctiol (flavanone)	Nuclear receptor coactivator 2
MOL002914	Eriodyctiol (flavanone)	Phosphatidylinositol-4,5-bisphosphate 3-kinase catalytic subunit, gamma isoform
MOL002914	Eriodyctiol (flavanone)	Glycogen phosphorylase, muscle form
MOL002914	Eriodyctiol (flavanone)	Calmodulin
MOL002915	Salvigenin	Nitric oxide synthase, inducible
MOL002915	Salvigenin	Prostaglandin G/H synthase 1
MOL002915	Salvigenin	Thrombin
MOL002915	Salvigenin	Sodium channel protein type 5 subunit alpha
MOL002915	Salvigenin	Coagulation factor Xa
MOL002915	Salvigenin	Prostaglandin G/H synthase 2
MOL002915	Salvigenin	Nitric-oxide synthase, endothelial
MOL002915	Salvigenin	Retinoic acid receptor RXR-alpha
MOL002915	Salvigenin	Acetylcholinesterase
MOL002915	Salvigenin	Alpha-1B adrenergic receptor
MOL002915	Salvigenin	Beta-2 adrenergic receptor
MOL002915	Salvigenin	Dipeptidyl peptidase IV
MOL002915	Salvigenin	Heat shock protein HSP 90
MOL002915	Salvigenin	Ig gamma-1 chain C region
MOL002915	Salvigenin	Trypsin-1
MOL002915	Salvigenin	Nuclear receptor coactivator 2
MOL002915	Salvigenin	Calmodulin
MOL002915	Salvigenin	Coagulation factor VII
MOL002917	5,2',6'-Trihydroxy-7,8-dimethoxyflavone	Nitric oxide synthase, inducible
MOL002917	5,2',6'-Trihydroxy-7,8-dimethoxyflavone	Prostaglandin G/H synthase 1
MOL002917	5,2',6'-Trihydroxy-7,8-dimethoxyflavone	Androgen receptor
MOL002917	5,2',6'-Trihydroxy-7,8-dimethoxyflavone	Sodium channel protein type 5 subunit alpha
MOL002917	5,2',6'-Trihydroxy-7,8-dimethoxyflavone	Coagulation factor Xa
MOL002917	5,2',6'-Trihydroxy-7,8-dimethoxyflavone	Prostaglandin G/H synthase 2
MOL002917	5,2',6'-Trihydroxy-7,8-dimethoxyflavone	DNA topoisomerase II
MOL002917	5,2',6'-Trihydroxy-7,8-dimethoxyflavone	Estrogen receptor beta
MOL002917	5,2',6'-Trihydroxy-7,8-dimethoxyflavone	Dipeptidyl peptidase IV
MOL002917	5,2',6'-Trihydroxy-7,8-dimethoxyflavone	Heat shock protein HSP 90
MOL002917	5,2',6'-Trihydroxy-7,8-dimethoxyflavone	Cell division protein kinase 2
MOL002917	5,2',6'-Trihydroxy-7,8-dimethoxyflavone	Phosphatidylinositol-4,5-bisphosphate 3-kinase catalytic subunit, gamma isoform
MOL002917	5,2',6'-Trihydroxy-7,8-dimethoxyflavone	Serine/threonine-protein kinase Chk1
MOL002917	5,2',6'-Trihydroxy-7,8-dimethoxyflavone	Trypsin-1
MOL002917	5,2',6'-Trihydroxy-7,8-dimethoxyflavone	Nuclear receptor coactivator 2
MOL002917	5,2',6'-Trihydroxy-7,8-dimethoxyflavone	Calmodulin
MOL002917	5,2',6'-Trihydroxy-7,8-dimethoxyflavone	Calcium-activated potassium channel subunit alpha 1
MOL002925	5,7,2',6'-Tetrahydroxyflavone	Prostaglandin G/H synthase 1
MOL002925	5,7,2',6'-Tetrahydroxyflavone	Androgen receptor
MOL002925	5,7,2',6'-Tetrahydroxyflavone	Prostaglandin G/H synthase 2
MOL002925	5,7,2',6'-Tetrahydroxyflavone	Dipeptidyl peptidase IV
MOL002925	5,7,2',6'-Tetrahydroxyflavone	Heat shock protein HSP 90
MOL002925	5,7,2',6'-Tetrahydroxyflavone	mRNA of PKA Catalytic Subunit C-alpha
MOL002927	Skullcapflavone II	Nitric oxide synthase, inducible
MOL002927	Skullcapflavone II	Prostaglandin G/H synthase 1
MOL002927	Skullcapflavone II	Thrombin
MOL002927	Skullcapflavone II	Potassium voltage-gated channel subfamily H member 2
MOL002927	Skullcapflavone II	Androgen receptor
MOL002927	Skullcapflavone II	Sodium channel protein type 5 subunit alpha
MOL002927	Skullcapflavone II	Coagulation factor Xa
MOL002927	Skullcapflavone II	Prostaglandin G/H synthase 2
MOL002927	Skullcapflavone II	Nitric-oxide synthase, endothelial
MOL002927	Skullcapflavone II	Coagulation factor VII
MOL002927	Skullcapflavone II	Vascular endothelial growth factor receptor 2
MOL002927	Skullcapflavone II	Voltage-dependent calcium channel subunit alpha-2/delta-1
MOL002927	Skullcapflavone II	DNA topoisomerase II
MOL002927	Skullcapflavone II	Dipeptidyl peptidase IV
MOL002927	Skullcapflavone II	Heat shock protein HSP 90
MOL002927	Skullcapflavone II	Ig gamma-1 chain C region
MOL002927	Skullcapflavone II	Trypsin-1
MOL002927	Skullcapflavone II	Nuclear receptor coactivator 2
MOL002927	Skullcapflavone II	Nuclear receptor coactivator 1
MOL002927	Skullcapflavone II	Calcium-activated potassium channel subunit alpha 1
MOL002927	Skullcapflavone II	Calmodulin
MOL002928	oroxylin a	Nitric oxide synthase, inducible
MOL002928	oroxylin a	Prostaglandin G/H synthase 1
MOL002928	oroxylin a	Androgen receptor
MOL002928	oroxylin a	Sodium channel protein type 5 subunit alpha
MOL002928	oroxylin a	Prostaglandin G/H synthase 2
MOL002928	oroxylin a	Retinoic acid receptor RXR-alpha
MOL002928	oroxylin a	CGMP-inhibited 3',5'-cyclic phosphodiesterase A
MOL002928	oroxylin a	Alpha-1B adrenergic receptor
MOL002928	oroxylin a	Beta-2 adrenergic receptor
MOL002928	oroxylin a	Dipeptidyl peptidase IV
MOL002928	oroxylin a	Heat shock protein HSP 90
MOL002928	oroxylin a	Phosphatidylinositol-4,5-bisphosphate 3-kinase catalytic subunit, gamma isoform
MOL002928	oroxylin a	mRNA of PKA Catalytic Subunit C-alpha
MOL002928	oroxylin a	Trypsin-1
MOL002928	oroxylin a	Nuclear receptor coactivator 1
MOL002928	oroxylin a	Calmodulin
MOL002928	oroxylin a	Nuclear receptor coactivator 2
MOL002928	oroxylin a	cAMP-dependent protein kinase inhibitor alpha
MOL002928	oroxylin a	Apoptosis regulator Bcl-2
MOL002928	oroxylin a	Interleukin-6
MOL002928	oroxylin a	Caspase-3
MOL002928	oroxylin a	Cell division control protein 2 homolog
MOL002928	oroxylin a	Cytochrome P450 1A2
MOL002928	oroxylin a	G2/mitotic-specific cyclin-B1
MOL002928	oroxylin a	Cell division protein kinase 7
MOL002928	oroxylin a	Cytochrome P450 2C9
MOL002932	Panicolin	Nitric oxide synthase, inducible
MOL002932	Panicolin	Prostaglandin G/H synthase 1
MOL002932	Panicolin	Androgen receptor
MOL002932	Panicolin	Sodium channel protein type 5 subunit alpha
MOL002932	Panicolin	Prostaglandin G/H synthase 2
MOL002932	Panicolin	Estrogen receptor beta
MOL002932	Panicolin	Dipeptidyl peptidase IV
MOL002932	Panicolin	Heat shock protein HSP 90
MOL002932	Panicolin	Cell division protein kinase 2
MOL002932	Panicolin	Serine/threonine-protein kinase Chk1
MOL002932	Panicolin	Trypsin-1
MOL002932	Panicolin	Calmodulin
MOL002932	Panicolin	Phosphatidylinositol-4,5-bisphosphate 3-kinase catalytic subunit, gamma isoform
MOL002932	Panicolin	Nuclear receptor coactivator 1
MOL002933	5,7,4'-Trihydroxy-8-methoxyflavone	Nitric oxide synthase, inducible
MOL002933	5,7,4'-Trihydroxy-8-methoxyflavone	Prostaglandin G/H synthase 1
MOL002933	5,7,4'-Trihydroxy-8-methoxyflavone	Estrogen receptor
MOL002933	5,7,4'-Trihydroxy-8-methoxyflavone	Androgen receptor
MOL002933	5,7,4'-Trihydroxy-8-methoxyflavone	Peroxisome proliferator activated receptor gamma
MOL002933	5,7,4'-Trihydroxy-8-methoxyflavone	Prostaglandin G/H synthase 2
MOL002933	5,7,4'-Trihydroxy-8-methoxyflavone	Dipeptidyl peptidase IV
MOL002933	5,7,4'-Trihydroxy-8-methoxyflavone	Glycogen phosphorylase, muscle form
MOL002933	5,7,4'-Trihydroxy-8-methoxyflavone	Mitogen-activated protein kinase 14
MOL002933	5,7,4'-Trihydroxy-8-methoxyflavone	Glycogen synthase kinase-3 beta
MOL002933	5,7,4'-Trihydroxy-8-methoxyflavone	Heat shock protein HSP 90
MOL002933	5,7,4'-Trihydroxy-8-methoxyflavone	Cell division protein kinase 2
MOL002933	5,7,4'-Trihydroxy-8-methoxyflavone	Phosphatidylinositol-4,5-bisphosphate 3-kinase catalytic subunit, gamma isoform
MOL002933	5,7,4'-Trihydroxy-8-methoxyflavone	Serine/threonine-protein kinase Chk1
MOL002933	5,7,4'-Trihydroxy-8-methoxyflavone	Trypsin-1
MOL002933	5,7,4'-Trihydroxy-8-methoxyflavone	Nuclear receptor coactivator 2
MOL002933	5,7,4'-Trihydroxy-8-methoxyflavone	Calmodulin
MOL002933	5,7,4'-Trihydroxy-8-methoxyflavone	mRNA of PKA Catalytic Subunit C-alpha
MOL002934	NEOBAICALEIN	Nitric oxide synthase, inducible
MOL002934	NEOBAICALEIN	Thrombin
MOL002934	NEOBAICALEIN	Potassium voltage-gated channel subfamily H member 2
MOL002934	NEOBAICALEIN	Estrogen receptor
MOL002934	NEOBAICALEIN	Androgen receptor
MOL002934	NEOBAICALEIN	Sodium channel protein type 5 subunit alpha
MOL002934	NEOBAICALEIN	Peroxisome proliferator activated receptor gamma
MOL002934	NEOBAICALEIN	Coagulation factor Xa
MOL002934	NEOBAICALEIN	Prostaglandin G/H synthase 2
MOL002934	NEOBAICALEIN	Coagulation factor VII
MOL002934	NEOBAICALEIN	mRNA of Protein-tyrosine phosphatase, non-receptor type 1
MOL002934	NEOBAICALEIN	DNA topoisomerase II
MOL002934	NEOBAICALEIN	Estrogen receptor beta
MOL002934	NEOBAICALEIN	Dipeptidyl peptidase IV
MOL002934	NEOBAICALEIN	Glycogen phosphorylase, muscle form
MOL002934	NEOBAICALEIN	Glycogen synthase kinase-3 beta
MOL002934	NEOBAICALEIN	Heat shock protein HSP 90
MOL002934	NEOBAICALEIN	Serine/threonine-protein kinase Chk1
MOL002934	NEOBAICALEIN	Trypsin-1
MOL002934	NEOBAICALEIN	Nuclear receptor coactivator 2
MOL002934	NEOBAICALEIN	Calcium-activated potassium channel subunit alpha 1
MOL002934	NEOBAICALEIN	Calmodulin
MOL002937	DIHYDROOROXYLIN	Prostaglandin G/H synthase 1
MOL002937	DIHYDROOROXYLIN	Sodium channel protein type 5 subunit alpha
MOL002937	DIHYDROOROXYLIN	Prostaglandin G/H synthase 2
MOL002937	DIHYDROOROXYLIN	Retinoic acid receptor RXR-alpha
MOL002937	DIHYDROOROXYLIN	CGMP-inhibited 3',5'-cyclic phosphodiesterase A
MOL002937	DIHYDROOROXYLIN	Alpha-1B adrenergic receptor
MOL002937	DIHYDROOROXYLIN	Beta-2 adrenergic receptor
MOL002937	DIHYDROOROXYLIN	Heat shock protein HSP 90
MOL002937	DIHYDROOROXYLIN	mRNA of PKA Catalytic Subunit C-alpha
MOL002937	DIHYDROOROXYLIN	Calmodulin
MOL002937	DIHYDROOROXYLIN	Nuclear receptor coactivator 1
MOL000358	beta-sitosterol	Progesterone receptor
MOL000358	beta-sitosterol	Nuclear receptor coactivator 2
MOL000358	beta-sitosterol	Prostaglandin G/H synthase 1
MOL000358	beta-sitosterol	Prostaglandin G/H synthase 2
MOL000358	beta-sitosterol	Heat shock protein HSP 90
MOL000358	beta-sitosterol	Phosphatidylinositol-4,5-bisphosphate 3-kinase catalytic subunit, gamma isoform
MOL000358	beta-sitosterol	Potassium voltage-gated channel subfamily H member 2
MOL000358	beta-sitosterol	mRNA of PKA Catalytic Subunit C-alpha
MOL000358	beta-sitosterol	Dopamine D1 receptor
MOL000358	beta-sitosterol	Muscarinic acetylcholine receptor M3
MOL000358	beta-sitosterol	Muscarinic acetylcholine receptor M1
MOL000358	beta-sitosterol	Sodium channel protein type 5 subunit alpha
MOL000358	beta-sitosterol	Gamma-aminobutyric-acid receptor alpha-2 subunit
MOL000358	beta-sitosterol	Muscarinic acetylcholine receptor M4
MOL000358	beta-sitosterol	CGMP-inhibited 3',5'-cyclic phosphodiesterase A
MOL000358	beta-sitosterol	5-hydroxytryptamine 2A receptor
MOL000358	beta-sitosterol	Gamma-aminobutyric-acid receptor alpha-5 subunit
MOL000358	beta-sitosterol	Alpha-1A adrenergic receptor
MOL000358	beta-sitosterol	Gamma-aminobutyric-acid receptor alpha-3 subunit
MOL000358	beta-sitosterol	Muscarinic acetylcholine receptor M2
MOL000358	beta-sitosterol	Alpha-1B adrenergic receptor
MOL000358	beta-sitosterol	Beta-2 adrenergic receptor
MOL000358	beta-sitosterol	Neuronal acetylcholine receptor subunit alpha-2
MOL000358	beta-sitosterol	Sodium-dependent serotonin transporter
MOL000358	beta-sitosterol	Mu-type opioid receptor
MOL000358	beta-sitosterol	Gamma-aminobutyric acid receptor subunit alpha-1
MOL000358	beta-sitosterol	Neuronal acetylcholine receptor protein, alpha-7 chain
MOL000358	beta-sitosterol	Cytochrome P450-cam
MOL000358	beta-sitosterol	Apoptosis regulator Bcl-2
MOL000358	beta-sitosterol	Apoptosis regulator BAX
MOL000358	beta-sitosterol	Caspase-9
MOL000358	beta-sitosterol	Transcription factor AP-1
MOL000358	beta-sitosterol	Caspase-3
MOL000358	beta-sitosterol	Caspase-8
MOL000358	beta-sitosterol	Protein kinase C alpha type
MOL000358	beta-sitosterol	Transforming growth factor beta-1
MOL000358	beta-sitosterol	Serum paraoxonase/arylesterase 1
MOL000358	beta-sitosterol	Microtubule-associated protein 2
MOL000359	sitosterol	Progesterone receptor
MOL000359	sitosterol	Nuclear receptor coactivator 2
MOL000359	sitosterol	Mineralocorticoid receptor
MOL000525	Norwogonin	Nitric oxide synthase, inducible
MOL000525	Norwogonin	Prostaglandin G/H synthase 1
MOL000525	Norwogonin	Androgen receptor
MOL000525	Norwogonin	Peroxisome proliferator activated receptor gamma
MOL000525	Norwogonin	Prostaglandin G/H synthase 2
MOL000525	Norwogonin	CGMP-inhibited 3',5'-cyclic phosphodiesterase A
MOL000525	Norwogonin	Dipeptidyl peptidase IV
MOL000525	Norwogonin	Heat shock protein HSP 90
MOL000525	Norwogonin	Cell division protein kinase 2
MOL000525	Norwogonin	Phosphatidylinositol-4,5-bisphosphate 3-kinase catalytic subunit, gamma isoform
MOL000525	Norwogonin	Serine/threonine-protein kinase Chk1
MOL000525	Norwogonin	mRNA of PKA Catalytic Subunit C-alpha
MOL000552	5,2'-Dihydroxy-6,7,8-trimethoxyflavone	Nitric oxide synthase, inducible
MOL000552	5,2'-Dihydroxy-6,7,8-trimethoxyflavone	Prostaglandin G/H synthase 1
MOL000552	5,2'-Dihydroxy-6,7,8-trimethoxyflavone	Thrombin
MOL000552	5,2'-Dihydroxy-6,7,8-trimethoxyflavone	Potassium voltage-gated channel subfamily H member 2
MOL000552	5,2'-Dihydroxy-6,7,8-trimethoxyflavone	Androgen receptor
MOL000552	5,2'-Dihydroxy-6,7,8-trimethoxyflavone	Sodium channel protein type 5 subunit alpha
MOL000552	5,2'-Dihydroxy-6,7,8-trimethoxyflavone	Coagulation factor Xa
MOL000552	5,2'-Dihydroxy-6,7,8-trimethoxyflavone	Prostaglandin G/H synthase 2
MOL000552	5,2'-Dihydroxy-6,7,8-trimethoxyflavone	Nitric-oxide synthase, endothelial
MOL000552	5,2'-Dihydroxy-6,7,8-trimethoxyflavone	Coagulation factor VII
MOL000552	5,2'-Dihydroxy-6,7,8-trimethoxyflavone	DNA topoisomerase II
MOL000552	5,2'-Dihydroxy-6,7,8-trimethoxyflavone	Estrogen receptor beta
MOL000552	5,2'-Dihydroxy-6,7,8-trimethoxyflavone	Dipeptidyl peptidase IV
MOL000552	5,2'-Dihydroxy-6,7,8-trimethoxyflavone	Peroxisome proliferator activated receptor delta
MOL000552	5,2'-Dihydroxy-6,7,8-trimethoxyflavone	Heat shock protein HSP 90
MOL000552	5,2'-Dihydroxy-6,7,8-trimethoxyflavone	Trypsin-1
MOL000552	5,2'-Dihydroxy-6,7,8-trimethoxyflavone	Nuclear receptor coactivator 2
MOL000552	5,2'-Dihydroxy-6,7,8-trimethoxyflavone	Calmodulin
MOL000552	5,2'-Dihydroxy-6,7,8-trimethoxyflavone	Vascular endothelial growth factor receptor 2
MOL000552	5,2'-Dihydroxy-6,7,8-trimethoxyflavone	Nuclear receptor coactivator 1
MOL000552	5,2'-Dihydroxy-6,7,8-trimethoxyflavone	Calcium-activated potassium channel subunit alpha 1
MOL000073	ent-Epicatechin	Prostaglandin G/H synthase 1
MOL000073	ent-Epicatechin	Estrogen receptor
MOL000073	ent-Epicatechin	Prostaglandin G/H synthase 2
MOL000073	ent-Epicatechin	Heat shock protein HSP 90
MOL000073	ent-Epicatechin	Beta-lactamase
MOL000073	ent-Epicatechin	mRNA of PKA Catalytic Subunit C-alpha
MOL000449	Stigmasterol	Progesterone receptor
MOL000449	Stigmasterol	Mineralocorticoid receptor
MOL000449	Stigmasterol	Nuclear receptor coactivator 2
MOL000449	Stigmasterol	Alcohol dehydrogenase 1C
MOL000449	Stigmasterol	Ig gamma-1 chain C region
MOL000449	Stigmasterol	Retinoic acid receptor RXR-alpha
MOL000449	Stigmasterol	Nuclear receptor coactivator 1
MOL000449	Stigmasterol	Prostaglandin G/H synthase 1
MOL000449	Stigmasterol	Prostaglandin G/H synthase 2
MOL000449	Stigmasterol	Alpha-2A adrenergic receptor
MOL000449	Stigmasterol	Sodium-dependent noradrenaline transporter
MOL000449	Stigmasterol	Sodium-dependent dopamine transporter
MOL000449	Stigmasterol	Beta-2 adrenergic receptor
MOL000449	Stigmasterol	Aldose reductase
MOL000449	Stigmasterol	Urokinase-type plasminogen activator
MOL000449	Stigmasterol	Leukotriene A-4 hydrolase
MOL000449	Stigmasterol	Amine oxidase [flavin-containing] B
MOL000449	Stigmasterol	Amine oxidase [flavin-containing] A
MOL000449	Stigmasterol	mRNA of PKA Catalytic Subunit C-alpha
MOL000449	Stigmasterol	Chymotrypsinogen B
MOL000449	Stigmasterol	Muscarinic acetylcholine receptor M3
MOL000449	Stigmasterol	Muscarinic acetylcholine receptor M1
MOL000449	Stigmasterol	Beta-1 adrenergic receptor
MOL000449	Stigmasterol	Sodium channel protein type 5 subunit alpha
MOL000449	Stigmasterol	5-hydroxytryptamine 2A receptor
MOL000449	Stigmasterol	Alpha-1A adrenergic receptor
MOL000449	Stigmasterol	Gamma-aminobutyric-acid receptor alpha-3 subunit
MOL000449	Stigmasterol	Muscarinic acetylcholine receptor M2
MOL000449	Stigmasterol	Alpha-1B adrenergic receptor
MOL000449	Stigmasterol	Gamma-aminobutyric acid receptor subunit alpha-1
MOL000449	Stigmasterol	Neuronal acetylcholine receptor protein, alpha-7 chain
MOL001458	coptisine	Nitric oxide synthase, inducible
MOL001458	coptisine	Prostaglandin G/H synthase 1
MOL001458	coptisine	Potassium voltage-gated channel subfamily H member 2
MOL001458	coptisine	Estrogen receptor
MOL001458	coptisine	Androgen receptor
MOL001458	coptisine	Sodium channel protein type 5 subunit alpha
MOL001458	coptisine	Prostaglandin G/H synthase 2
MOL001458	coptisine	Nitric-oxide synthase, endothelial
MOL001458	coptisine	Trypsin-1
MOL001490	bis[(2S)-2-ethylhexyl] benzene-1,2-dicarboxylate	Sodium channel protein type 5 subunit alpha
MOL002879	Diop	Sodium channel protein type 5 subunit alpha
MOL002879	Diop	Beta-2 adrenergic receptor
MOL002879	Diop	Muscarinic acetylcholine receptor M3
MOL002897	epiberberine	Nitric oxide synthase, inducible
MOL002897	epiberberine	Potassium voltage-gated channel subfamily H member 2
MOL002897	epiberberine	Estrogen receptor
MOL002897	epiberberine	Androgen receptor
MOL002897	epiberberine	Prostaglandin G/H synthase 2
MOL002897	epiberberine	Nitric-oxide synthase, endothelial
MOL002897	epiberberine	Retinoic acid receptor RXR-alpha
MOL002897	epiberberine	mRNA of PKA Catalytic Subunit C-alpha
MOL002897	epiberberine	Trypsin-1
MOL002897	epiberberine	Nuclear receptor coactivator 2
MOL002897	epiberberine	cAMP and cAMP-inhibited cGMP 3',5'-cyclic phosphodiesterase 10A
MOL002897	epiberberine	Nitric-oxide synthase, endothelial
MOL002897	epiberberine	Retinoic acid receptor RXR-alpha
MOL002897	epiberberine	mRNA of PKA Catalytic Subunit C-alpha
MOL002897	epiberberine	Trypsin-1
MOL002897	epiberberine	Nuclear receptor coactivator 2
MOL002897	epiberberine	cAMP and cAMP-inhibited cGMP 3',5'-cyclic phosphodiesterase 10A
MOL008206	Moslosooflavone	Nitric oxide synthase, inducible
MOL008206	Moslosooflavone	Prostaglandin G/H synthase 1
MOL008206	Moslosooflavone	Thrombin
MOL008206	Moslosooflavone	Androgen receptor
MOL008206	Moslosooflavone	Sodium channel protein type 5 subunit alpha
MOL008206	Moslosooflavone	Peroxisome proliferator activated receptor gamma
MOL008206	Moslosooflavone	Prostaglandin G/H synthase 2
MOL008206	Moslosooflavone	Retinoic acid receptor RXR-alpha
MOL008206	Moslosooflavone	Estrogen receptor beta
MOL008206	Moslosooflavone	Gamma-aminobutyric acid receptor subunit alpha-1
MOL008206	Moslosooflavone	Dipeptidyl peptidase IV
MOL008206	Moslosooflavone	Mitogen-activated protein kinase 14
MOL008206	Moslosooflavone	Glycogen synthase kinase-3 beta
MOL008206	Moslosooflavone	Heat shock protein HSP 90
MOL008206	Moslosooflavone	Cell division protein kinase 2
MOL008206	Moslosooflavone	Phosphatidylinositol-4,5-bisphosphate 3-kinase catalytic subunit, gamma isoform
MOL008206	Moslosooflavone	Serine/threonine-protein kinase Chk1
MOL008206	Moslosooflavone	mRNA of PKA Catalytic Subunit C-alpha
MOL008206	Moslosooflavone	Trypsin-1
MOL008206	Moslosooflavone	Nuclear receptor coactivator 1
MOL008206	Moslosooflavone	Calcium-activated potassium channel subunit alpha 1
MOL008206	Moslosooflavone	Calmodulin
MOL008206	Moslosooflavone	Alpha-1B adrenergic receptor
MOL008206	Moslosooflavone	Beta-2 adrenergic receptor
MOL008206	Moslosooflavone	Neuronal acetylcholine receptor protein, alpha-7 chain
MOL010415	11,13-Eicosadienoic acid, methyl ester	Nuclear receptor coactivator 2
MOL012245	5,7,4'-trihydroxy-6-methoxyflavanone	Prostaglandin G/H synthase 1
MOL012245	5,7,4'-trihydroxy-6-methoxyflavanone	Prostaglandin G/H synthase 2
MOL012245	5,7,4'-trihydroxy-6-methoxyflavanone	Carbonic anhydrase II
MOL012245	5,7,4'-trihydroxy-6-methoxyflavanone	Heat shock protein HSP 90
MOL012245	5,7,4'-trihydroxy-6-methoxyflavanone	mRNA of PKA Catalytic Subunit C-alpha
MOL012245	5,7,4'-trihydroxy-6-methoxyflavanone	Calmodulin
MOL012246	5,7,4'-trihydroxy-8-methoxyflavanone	Prostaglandin G/H synthase 1
MOL012246	5,7,4'-trihydroxy-8-methoxyflavanone	Prostaglandin G/H synthase 2
MOL012246	5,7,4'-trihydroxy-8-methoxyflavanone	Carbonic anhydrase II
MOL012246	5,7,4'-trihydroxy-8-methoxyflavanone	Heat shock protein HSP 90
MOL012246	5,7,4'-trihydroxy-8-methoxyflavanone	Phosphatidylinositol-4,5-bisphosphate 3-kinase catalytic subunit, gamma isoform
MOL012246	5,7,4'-trihydroxy-8-methoxyflavanone	mRNA of PKA Catalytic Subunit C-alpha
MOL012266	rivularin	Nitric oxide synthase, inducible
MOL012266	rivularin	Prostaglandin G/H synthase 1
MOL012266	rivularin	Thrombin
MOL012266	rivularin	Potassium voltage-gated channel subfamily H member 2
MOL012266	rivularin	Androgen receptor
MOL012266	rivularin	Sodium channel protein type 5 subunit alpha
MOL012266	rivularin	Coagulation factor Xa
MOL012266	rivularin	Prostaglandin G/H synthase 2
MOL012266	rivularin	Nitric-oxide synthase, endothelial
MOL012266	rivularin	Carbonic anhydrase II
MOL012266	rivularin	Coagulation factor VII
MOL012266	rivularin	Vascular endothelial growth factor receptor 2
MOL012266	rivularin	Retinoic acid receptor RXR-alpha
MOL012266	rivularin	DNA topoisomerase II
MOL012266	rivularin	Estrogen receptor beta
MOL012266	rivularin	Dipeptidyl peptidase IV
MOL012266	rivularin	Heat shock protein HSP 90
MOL012266	rivularin	Trypsin-1
MOL012266	rivularin	Nuclear receptor coactivator 2
MOL012266	rivularin	Nuclear receptor coactivator 1
MOL012266	rivularin	Calcium-activated potassium channel subunit alpha 1
MOL012266	rivularin	Calmodulin
