# Supplementary material for: The potential mechanism of Huangqin for treatment of systemic lupus erythematosus based on network pharmacology, molecular docking and molecular dynamics simulation
Source: PeerJ. 2025 Jun 26;13:e19536. doi: 10.7717/peerj.19536 (PMC12206403; doi:10.7717/peerj.19536)
Supplement: Supplemental Information 2 [file peerj-13-19536-s002.xlsx]

## Sheet: Sheet1
Supplementary Table S2 SLE-related 1638 potential targets in 3 databases
Gene Symbol	Database
TREX1	Gene Cards	KEGG
ATRIP	Gene Cards
ATRIP-TREX1	Gene Cards
IRF5	Gene Cards
STAT4	Gene Cards
TNF	Gene Cards	KEGG
CTLA4	Gene Cards	KEGG
BLK	Gene Cards
CR2	Gene Cards
DNASE1L3	Gene Cards	KEGG
TLR7	Gene Cards
C4A	Gene Cards	KEGG
HLA-DRB1	Gene Cards
DNASE1	Gene Cards
IL10	Gene Cards
PDCD1	Gene Cards	KEGG
PTPN22	Gene Cards	KEGG
FCGR2B	Gene Cards	KEGG
FCGR2A	Gene Cards	KEGG
ITGAM	Gene Cards
BANK1	Gene Cards
C4B	Gene Cards	KEGG
TNFSF4	Gene Cards	KEGG
SOCS1	Gene Cards		GEO
TNFAIP3	Gene Cards	KEGG
SPP1	Gene Cards
TNIP1	Gene Cards
FCGR3B	Gene Cards	KEGG
PXK	Gene Cards
IL6	Gene Cards
MECP2	Gene Cards
C1QA	Gene Cards
IRAK1	Gene Cards
TLR5	Gene Cards	KEGG
ETS1	Gene Cards
ENG	Gene Cards
UBE2L3	Gene Cards
SLC22A5	Gene Cards
SLEB3	Gene Cards
SLEB4	Gene Cards
LOC126860303	Gene Cards
SLEN1	Gene Cards
SLEN2	Gene Cards
SLEN3	Gene Cards
MIR223	Gene Cards
JAZF1	Gene Cards
MIR142	Gene Cards
MIR30A	Gene Cards
MIR210	Gene Cards
C1R	Gene Cards
MALAT1	Gene Cards
SLEB12	Gene Cards
SLEB13	Gene Cards
SLEB14	Gene Cards
SLEB5	Gene Cards
SLEB7	Gene Cards
SLEB8	Gene Cards
KIAA0319L	Gene Cards
SAMHD1	Gene Cards
ACE	Gene Cards
AP4B1-AS1	Gene Cards
SLEH1	Gene Cards
MIR150	Gene Cards
MIR195	Gene Cards
NEAT1	Gene Cards
IGHG1	Gene Cards
CP	Gene Cards
MIR15B	Gene Cards
MIR494	Gene Cards
MIR324	Gene Cards
MIR200C	Gene Cards
MIR23A	Gene Cards
MIR130B	Gene Cards
HLA-DQB1	Gene Cards	KEGG
MIR185	Gene Cards
IFNG	Gene Cards
MIR486-1	Gene Cards
MIRLET7E	Gene Cards
MIR99A	Gene Cards
MIR320A	Gene Cards
MIR663A	Gene Cards
C3	Gene Cards
APOH	Gene Cards
MIR296	Gene Cards
MIR638	Gene Cards
MIR30D	Gene Cards
C1QC	Gene Cards
MIR197	Gene Cards
MIR615	Gene Cards
MIR629	Gene Cards
MIR345	Gene Cards
MIR134	Gene Cards
MIR654	Gene Cards
MIR433	Gene Cards
MIR92B	Gene Cards
MBL2	Gene Cards
CD40LG	Gene Cards
MIR381	Gene Cards
C1QB	Gene Cards
SLEB15	Gene Cards
IFIH1	Gene Cards		GEO
MIR208A	Gene Cards
MIR184	Gene Cards
MIR500A	Gene Cards
TP53	Gene Cards
MIR642A	Gene Cards
MIR198	Gene Cards
NLRP1	Gene Cards
MIR769	Gene Cards
MIR518B	Gene Cards
PRKCD	Gene Cards
MIR484	Gene Cards
MIR346	Gene Cards
MIR575	Gene Cards
FASLG	Gene Cards
MIR611	Gene Cards
MIR622	Gene Cards
CRP	Gene Cards	KEGG
MIR608	Gene Cards
MIR657	Gene Cards
MIR601	Gene Cards
MIR557	Gene Cards
MIR583	Gene Cards
MIR596	Gene Cards
ENSG00000266919	Gene Cards
MIR637	Gene Cards
MIR612	Gene Cards
MIR325	Gene Cards
FCGR3A	Gene Cards	KEGG
MIR662	Gene Cards
MIR658	Gene Cards
MIR602	Gene Cards
MIR600	Gene Cards
FAS	Gene Cards
CCL2	Gene Cards
HLA-DQA1	Gene Cards	KEGG
TGFB1	Gene Cards		GEO
IL2	Gene Cards
TRIM21	Gene Cards
CR1	Gene Cards
IL1B	Gene Cards
CCR6	Gene Cards
F2	Gene Cards
C2	Gene Cards	KEGG
IL17A	Gene Cards
TLR9	Gene Cards
KIT	Gene Cards
IL4	Gene Cards
TNFSF13B	Gene Cards	KEGG	GEO
PRL	Gene Cards
IFNA1	Gene Cards		GEO
TNFRSF1B	Gene Cards	KEGG
TLR4	Gene Cards
AGTR1	Gene Cards
MIF	Gene Cards
IL18	Gene Cards
CFH	Gene Cards
IL2RA	Gene Cards
C1S	Gene Cards
STAT1	Gene Cards		GEO
VEGFA	Gene Cards
SSB	Gene Cards
PTEN	Gene Cards
NOS3	Gene Cards
CCR5	Gene Cards
MIR125A	Gene Cards
CXCL8	Gene Cards
ALB	Gene Cards
SYK	Gene Cards
FOXP3	Gene Cards
SERPINE1	Gene Cards
MIR155	Gene Cards
CD40	Gene Cards
HLA-DPB1	Gene Cards
BCL2	Gene Cards
TLR2	Gene Cards
F3	Gene Cards
STAT3	Gene Cards
HMGB1	Gene Cards
ICAM1	Gene Cards
DNMT1	Gene Cards
MIR21	Gene Cards
MIR146A	Gene Cards
EGFR	Gene Cards
LYN	Gene Cards
INS	Gene Cards
CAT	Gene Cards
GAS5	Gene Cards
MPO	Gene Cards
IL1RN	Gene Cards
AKT1	Gene Cards
TYK2	Gene Cards
CALR	Gene Cards
TNFRSF1A	Gene Cards	KEGG
TRAF3IP2	Gene Cards
CD4	Gene Cards
B2M	Gene Cards
MMP9	Gene Cards
CD55	Gene Cards
NOD2	Gene Cards
PTPRC	Gene Cards
THBD	Gene Cards
CCL5	Gene Cards
IL21	Gene Cards
ADAR	Gene Cards
SERPINC1	Gene Cards
HAVCR2	Gene Cards
NCF1	Gene Cards
TNFRSF13C	Gene Cards
HLA-A	Gene Cards
FCN3	Gene Cards
TMX2-CTNND1	Gene Cards		GEO
CD44	Gene Cards
VWF	Gene Cards
SELE	Gene Cards
CYP2C19	Gene Cards
LTA	Gene Cards
MASP2	Gene Cards
PPARG	Gene Cards
NLRP3	Gene Cards
CFI	Gene Cards
SNRNP70	Gene Cards
STING1	Gene Cards
RNASEH2C	Gene Cards
C5	Gene Cards
IL12B	Gene Cards
TAP2	Gene Cards
SAT1	Gene Cards		GEO
IL1A	Gene Cards
EDN1	Gene Cards
BTNL2	Gene Cards
CXCL10	Gene Cards
ATG5	Gene Cards
IRF7	Gene Cards		GEO
CD247	Gene Cards
CD274	Gene Cards
RASGRP1	Gene Cards
TLR3	Gene Cards
NR3C1	Gene Cards
MX1	Gene Cards		GEO
MMP2	Gene Cards
RNASEH2B	Gene Cards
IL13	Gene Cards
MYD88	Gene Cards		GEO
CD46	Gene Cards
VCAM1	Gene Cards
CD28	Gene Cards
IKZF1	Gene Cards
MIR145	Gene Cards
MTOR	Gene Cards
RIGI	Gene Cards
S100A9	Gene Cards
FCRL3	Gene Cards		GEO
ADA	Gene Cards
CSK	Gene Cards
CD80	Gene Cards
HLA-DQA2	Gene Cards
HLA-DPA1	Gene Cards
TNFSF13	Gene Cards	KEGG
ADIPOQ	Gene Cards
CXCL12	Gene Cards
NOTCH1	Gene Cards
CFB	Gene Cards
RO60	Gene Cards
PRTN3	Gene Cards
CASP3	Gene Cards
CD86	Gene Cards
S100A8	Gene Cards
IRF3	Gene Cards
TNFRSF13B	Gene Cards	KEGG
CD27	Gene Cards
TLR8	Gene Cards
MEFV	Gene Cards
HLA-B	Gene Cards
IRF8	Gene Cards
CXCR3	Gene Cards
ESR1	Gene Cards
CIITA	Gene Cards
APOA1	Gene Cards
PSMB8	Gene Cards
SELP	Gene Cards
PON1	Gene Cards
HMOX1	Gene Cards
TGFB2	Gene Cards
GATA3	Gene Cards
HSP90AA1	Gene Cards
ELANE	Gene Cards
TNFSF12	Gene Cards	KEGG
NFE2L2	Gene Cards
PTGS2	Gene Cards
IL6R	Gene Cards
ANXA5	Gene Cards
IFNA2	Gene Cards
PDGFRA	Gene Cards
SNRPN	Gene Cards
AGT	Gene Cards
CD79A	Gene Cards
ITGB2	Gene Cards
AGER	Gene Cards
IFNGR1	Gene Cards
IL5	Gene Cards
MIR221	Gene Cards
HIF1A	Gene Cards
CXCR4	Gene Cards
HLA-DRA	Gene Cards
IL2RB	Gene Cards
TRAF3IP2-AS1	Gene Cards
H19	Gene Cards
TFRC	Gene Cards
LTF	Gene Cards
IL15	Gene Cards
GAS6	Gene Cards
IFNB1	Gene Cards
FOS	Gene Cards
FGF2	Gene Cards
PTX3	Gene Cards
ADAMTS13	Gene Cards
ISG15	Gene Cards		GEO
FAM167A	Gene Cards
FN1	Gene Cards
RASGRP3	Gene Cards
HLA-DMA	Gene Cards
ANGPT2	Gene Cards
ITGAX	Gene Cards
C4B_2	Gene Cards
CD59	Gene Cards
BDNF-AS	Gene Cards
CASP8	Gene Cards
PHRF1	Gene Cards
XRCC6	Gene Cards
LGALS3	Gene Cards
CCR2	Gene Cards	KEGG
IRF1	Gene Cards
TGFBR1	Gene Cards
RNASEH2A	Gene Cards
PLG	Gene Cards
SEMA3A	Gene Cards
LINC01672	Gene Cards
PLAUR	Gene Cards
ICOSLG	Gene Cards
CSF3	Gene Cards
GRN	Gene Cards
IL1R1	Gene Cards
BDNF	Gene Cards
LEP	Gene Cards
RNPC3	Gene Cards
FLT1	Gene Cards
MT-ATP6	Gene Cards
MMP3	Gene Cards
C5AR1	Gene Cards
IFNAR1	Gene Cards
RAG2	Gene Cards
IL33	Gene Cards
LINC02605	Gene Cards
KRAS	Gene Cards
AIM2	Gene Cards
JAK1	Gene Cards
CSF2	Gene Cards
VDR	Gene Cards
LCK	Gene Cards
HSPD1	Gene Cards
LCN2	Gene Cards
IL17F	Gene Cards
CCR1	Gene Cards
F5	Gene Cards
ICOS	Gene Cards
SLC15A4	Gene Cards
IL23A	Gene Cards
TRAF6	Gene Cards
CCR4	Gene Cards
CXCR5	Gene Cards
SNRPD1	Gene Cards
MIR148A	Gene Cards
SOD1	Gene Cards
TPMT	Gene Cards
USP18	Gene Cards		GEO
MIRLET7C	Gene Cards
SOCS3	Gene Cards
HRAS	Gene Cards
WDFY4	Gene Cards
MIR126	Gene Cards
PRDM1	Gene Cards
KLRK1	Gene Cards
CXCL13	Gene Cards
TNFRSF17	Gene Cards	KEGG
LSM2	Gene Cards
HGF	Gene Cards
XIST	Gene Cards
TRAF1	Gene Cards
IL12RB1	Gene Cards
CREM	Gene Cards
CD70	Gene Cards
CTNNB1	Gene Cards
SULT1A3	Gene Cards
ACP5	Gene Cards
CCR7	Gene Cards
ADA2	Gene Cards
P2RX7	Gene Cards
CCL3	Gene Cards
RAG1	Gene Cards
RIPK1	Gene Cards
BLTP3A	Gene Cards
FOXO1	Gene Cards
CD244	Gene Cards
CSF1	Gene Cards
CST3	Gene Cards
CCN2	Gene Cards
CLU	Gene Cards
IL7	Gene Cards
MERTK	Gene Cards
SELL	Gene Cards
TNFRSF4	Gene Cards	KEGG
MTHFR	Gene Cards
NFKBIA	Gene Cards
TPO	Gene Cards
IL1RAPL2	Gene Cards
RBP4	Gene Cards
IL10RA	Gene Cards
MYC	Gene Cards
RPL7	Gene Cards
PGF	Gene Cards		GEO
IGF1	Gene Cards
CD69	Gene Cards
FGFR1	Gene Cards
PRF1	Gene Cards
CX3CR1	Gene Cards
TBX21	Gene Cards
AXL	Gene Cards
SPTAN1	Gene Cards
OAS1	Gene Cards		GEO
HAMP	Gene Cards
CD38	Gene Cards
GFAP	Gene Cards
APOE	Gene Cards
TBK1	Gene Cards
CREB1	Gene Cards
SLAMF1	Gene Cards
H2AC18	Gene Cards
KMT2D	Gene Cards
CTSG	Gene Cards
CCL17	Gene Cards
MIR423	Gene Cards
IL16	Gene Cards
FCGR1A	Gene Cards
FBN1	Gene Cards
MBP	Gene Cards
POMC	Gene Cards
ERBB2	Gene Cards
MAPK1	Gene Cards
MIR483	Gene Cards
IL19	Gene Cards
NRP1	Gene Cards
IL21R	Gene Cards
DNASE2	Gene Cards	KEGG
CD5	Gene Cards
ANXA1	Gene Cards
NCF2	Gene Cards
CXCL1	Gene Cards
JAK2	Gene Cards
IL22	Gene Cards
SIRT1	Gene Cards
CFHR5	Gene Cards
CXCL9	Gene Cards
CDKN1A	Gene Cards
PIK3CG	Gene Cards
CD72	Gene Cards
FCN2	Gene Cards
VTN	Gene Cards
IL9	Gene Cards
RPLP0	Gene Cards
CD22	Gene Cards
HSP90AB1	Gene Cards
CEBPB	Gene Cards
IL37	Gene Cards
XRCC5	Gene Cards
IDO1	Gene Cards
CCL4	Gene Cards
ANXA2	Gene Cards
APOL1	Gene Cards
LTK	Gene Cards
CD8A	Gene Cards
CX3CL1	Gene Cards
CBL	Gene Cards
CENPB	Gene Cards
APCS	Gene Cards
COL1A1	Gene Cards
CHUK	Gene Cards
HLA-DRB5	Gene Cards
BRAF	Gene Cards
ADAM17	Gene Cards
MSN	Gene Cards
CXCL16	Gene Cards
HAVCR1	Gene Cards
IL23R	Gene Cards
TTR	Gene Cards
LGALS3BP	Gene Cards		GEO
MAPT	Gene Cards
PF4	Gene Cards
MEG3	Gene Cards
SDC1	Gene Cards
PROCR	Gene Cards
PSME3	Gene Cards
CDKN2A	Gene Cards
ABCB1	Gene Cards
NAT2	Gene Cards
PADI4	Gene Cards
CHI3L1	Gene Cards
IKBKG	Gene Cards
NFKB1	Gene Cards
DRD4	Gene Cards
NPY	Gene Cards
ENO1	Gene Cards
SSRP1	Gene Cards
SNCA	Gene Cards
MIR3148	Gene Cards
SIGLEC1	Gene Cards
OCA2	Gene Cards
SLC6A4	Gene Cards
CD19	Gene Cards
TET2	Gene Cards
NOS2	Gene Cards
GBA1	Gene Cards
GIMAP5	Gene Cards
FOXO3	Gene Cards
NF1	Gene Cards
SRSF1	Gene Cards
SNRPB	Gene Cards
MIR302D	Gene Cards
HLA-G	Gene Cards
IL25	Gene Cards
TAP1	Gene Cards
ALYREF	Gene Cards
MSH6	Gene Cards
CERNA3	Gene Cards
XK	Gene Cards
FOXJ1	Gene Cards
CAMK4	Gene Cards
CLEC4C	Gene Cards
PLAT	Gene Cards
PTPN11	Gene Cards
HLA-C	Gene Cards
ALCAM	Gene Cards
TNFRSF10A	Gene Cards	KEGG
MIR17	Gene Cards
PPIA	Gene Cards
CYBA	Gene Cards
CYP3A4	Gene Cards
SLC5A11	Gene Cards
CALCA	Gene Cards
PNP	Gene Cards
TH	Gene Cards
CGAS	Gene Cards
FLT3LG	Gene Cards		GEO
IFI16	Gene Cards		GEO
PMS2	Gene Cards
AIRE	Gene Cards
MAN2A1	Gene Cards
RPLP2	Gene Cards
NRAS	Gene Cards
PDGFRB	Gene Cards
NGF	Gene Cards
TNPO3	Gene Cards
IFNA17	Gene Cards		GEO
CREBBP	Gene Cards
DNMT3A	Gene Cards
TNFSF11	Gene Cards	KEGG
TGFBR2	Gene Cards
MIR34A	Gene Cards
LGALS8	Gene Cards
CDH1	Gene Cards
CYP2D6	Gene Cards
HLA-DQB2	Gene Cards
TSIX	Gene Cards
SMARCB1	Gene Cards
KDR	Gene Cards
RUNX1	Gene Cards
IL7R	Gene Cards
FCGRT	Gene Cards
CRH	Gene Cards
LRRK2	Gene Cards
CYP1A1	Gene Cards
CD180	Gene Cards
PLA2G6	Gene Cards
HNRNPC	Gene Cards
HFE	Gene Cards
CD36	Gene Cards
SLAMF7	Gene Cards
SOX10	Gene Cards
DSP	Gene Cards
SMAD3	Gene Cards
IL34	Gene Cards
EXO1	Gene Cards
IFITM1	Gene Cards
CDKN1B	Gene Cards
SLAMF6	Gene Cards
LY9	Gene Cards
AR	Gene Cards
IRF4	Gene Cards	KEGG
CFTR	Gene Cards
KITLG	Gene Cards
MIR146B	Gene Cards
COQ2	Gene Cards
PIK3CD	Gene Cards
IL17C	Gene Cards
MIR143	Gene Cards
ISG20	Gene Cards
IGF2	Gene Cards
EPSTI1	Gene Cards		GEO
KCNQ1	Gene Cards
CYP2B6	Gene Cards
S100B	Gene Cards
GLDC	Gene Cards
MAVS	Gene Cards
CBS	Gene Cards
TNFRSF11B	Gene Cards	KEGG
GALC	Gene Cards
APOB	Gene Cards
TASL	Gene Cards
IL12A	Gene Cards
MTMR3	Gene Cards
NPPA	Gene Cards
BMP6	Gene Cards
PLP1	Gene Cards
IL6ST	Gene Cards
ACE2	Gene Cards
MLH1	Gene Cards
CYBB	Gene Cards
FGA	Gene Cards
MIR3074	Gene Cards
SOX9	Gene Cards
RNY1	Gene Cards
CCND1	Gene Cards
IFIT3	Gene Cards		GEO
MICA	Gene Cards
CYP19A1	Gene Cards
DDX60	Gene Cards		GEO
EGR2	Gene Cards
PLA2R1	Gene Cards
TNXB	Gene Cards
IL17B	Gene Cards
GATA4	Gene Cards
COMT	Gene Cards
ITGB3	Gene Cards
GSTM1	Gene Cards
MEN1	Gene Cards
JUN	Gene Cards
GSTP1	Gene Cards
GTF2I	Gene Cards
CD84	Gene Cards
MME	Gene Cards
NKX2-5	Gene Cards
MDM2	Gene Cards
DYNC1H1	Gene Cards
MIR410	Gene Cards
SST	Gene Cards
STXBP2	Gene Cards
DRD2	Gene Cards
HPRT1	Gene Cards
CPT2	Gene Cards
CYP3A5	Gene Cards
NEFL	Gene Cards
ESR2	Gene Cards
PLAU	Gene Cards
NEU1	Gene Cards
TIMP1	Gene Cards
ATL1	Gene Cards
SOD2-OT1	Gene Cards
TNFSF10	Gene Cards	KEGG
SLC7A5	Gene Cards
SH2D1A	Gene Cards
CYP21A2	Gene Cards
FLNA	Gene Cards		GEO
GJA1	Gene Cards
EZH2	Gene Cards
MYH7	Gene Cards
SMAD5-AS1	Gene Cards
MMP1	Gene Cards
VHL	Gene Cards
CHD7	Gene Cards
ZAP70	Gene Cards
F8	Gene Cards
PVT1	Gene Cards
TUG1	Gene Cards
TF	Gene Cards		GEO
SNRPE	Gene Cards
SERPING1	Gene Cards
SETX	Gene Cards
L1CAM	Gene Cards
MICB	Gene Cards
ACHE	Gene Cards
TERT	Gene Cards
MOG	Gene Cards
IVL	Gene Cards
SOD2	Gene Cards
UNC13D	Gene Cards
PEPD	Gene Cards
LBR	Gene Cards
PARP1	Gene Cards
BAX	Gene Cards
FLNC	Gene Cards
LINC-ROR	Gene Cards
LRRC56	Gene Cards
NTRK1	Gene Cards
TTN	Gene Cards
SYNGAP1	Gene Cards
HSPA1A	Gene Cards
FLI1	Gene Cards
SMARCA4	Gene Cards
NTRK2	Gene Cards
MTR	Gene Cards
DBH	Gene Cards
GHRL	Gene Cards
DDX41	Gene Cards
ITGB1	Gene Cards
MIR20A	Gene Cards
CSF1R	Gene Cards
PSMB9	Gene Cards
NKX2-1	Gene Cards
LAMC2	Gene Cards
TRIM68	Gene Cards
IGF1R	Gene Cards
SLC7A7	Gene Cards
SNRPD3	Gene Cards
PRKN	Gene Cards
SERPINA1	Gene Cards
MIR7-3HG	Gene Cards
CNTF	Gene Cards
EP300	Gene Cards
FADD	Gene Cards
BMP2	Gene Cards
SRC	Gene Cards
IFIT1	Gene Cards		GEO
NCF4	Gene Cards
MIRLET7B	Gene Cards
SKIC2	Gene Cards
CDKN2B-AS1	Gene Cards
MAPK3	Gene Cards
NPPB	Gene Cards
FLNB	Gene Cards		GEO
TYR	Gene Cards
HTR1A	Gene Cards
HOTAIR	Gene Cards
ERCC2	Gene Cards
ITGAL	Gene Cards
LEPR	Gene Cards
MIR127	Gene Cards
NOS1	Gene Cards
AMT	Gene Cards
DMD	Gene Cards
GAL	Gene Cards
EPO	Gene Cards
HSPA1B	Gene Cards
WT1	Gene Cards
LIG4	Gene Cards
HLA-DMB	Gene Cards
ASPM	Gene Cards
MIR25	Gene Cards
MIR31	Gene Cards
MIR98	Gene Cards
CHGA	Gene Cards
CLEC7A	Gene Cards
MSH5	Gene Cards
MAPK8	Gene Cards
CYP1A2	Gene Cards
KEAP1	Gene Cards
RAF1	Gene Cards
MAPK10	Gene Cards
PSAP	Gene Cards
IL4R	Gene Cards
SLC22A4	Gene Cards
CDK4	Gene Cards
GABBR1	Gene Cards
STAT5A	Gene Cards
PGR-AS1	Gene Cards
SH2B3	Gene Cards
RETN	Gene Cards
ELN	Gene Cards
EEA1	Gene Cards
HSPA4	Gene Cards
NBN	Gene Cards
MIR29A	Gene Cards
GSN	Gene Cards
NTNG2	Gene Cards
TGFB3	Gene Cards
BTK	Gene Cards
ERBB4	Gene Cards
VIP	Gene Cards
GHR	Gene Cards
NAGLU	Gene Cards
GNRH1	Gene Cards
BCL6	Gene Cards
GNRHR	Gene Cards
LMNB1	Gene Cards
ATP7B	Gene Cards
U2AF1	Gene Cards
PCNA	Gene Cards
BGLAP	Gene Cards
XDH	Gene Cards
IKBKB	Gene Cards
MIR451A	Gene Cards
GSTT1	Gene Cards
MAG	Gene Cards
EGF	Gene Cards
CRB1	Gene Cards
PURA	Gene Cards
GZMB	Gene Cards
TOP1	Gene Cards
ATXN2	Gene Cards
FUS	Gene Cards
PAH	Gene Cards
ERBB3	Gene Cards
GRB2	Gene Cards
CYCS	Gene Cards
RYR1	Gene Cards
RPS27A	Gene Cards
RELA	Gene Cards
FLT3	Gene Cards
MIR140	Gene Cards
CFP	Gene Cards
MIR125B1	Gene Cards
SOX2	Gene Cards
BMP4	Gene Cards
XRCC1	Gene Cards
MIR30E	Gene Cards
SMPD1	Gene Cards
IL2RG	Gene Cards		GEO
ERCC6	Gene Cards
INSR	Gene Cards
HLA-DOA	Gene Cards
CYP17A1	Gene Cards
FGF8	Gene Cards
AIF1	Gene Cards
DDC	Gene Cards
ITGA2B	Gene Cards		GEO
G6PD	Gene Cards
HLA-DRB4	Gene Cards
MIR27A	Gene Cards
SFTPD	Gene Cards
IKZF3	Gene Cards
DOCK8	Gene Cards
CDKN3	Gene Cards
LDLR	Gene Cards		GEO
C3AR1	Gene Cards
CD14	Gene Cards
IFNG-AS1	Gene Cards
TNFRSF11A	Gene Cards	KEGG
BMPR2	Gene Cards
EDN3	Gene Cards
F9	Gene Cards
PDHX	Gene Cards
JAK3	Gene Cards
CASP10	Gene Cards
ACTA2	Gene Cards
LZTR1	Gene Cards
MT-CO1	Gene Cards
HBB	Gene Cards
ENO2	Gene Cards
NOTCH3	Gene Cards
CDK5	Gene Cards
VCP	Gene Cards
TBP	Gene Cards
MAOA	Gene Cards
MAPK14	Gene Cards
MIAT	Gene Cards
RMRP	Gene Cards
CCK	Gene Cards
FYN	Gene Cards
TRA-TGC7-1	Gene Cards
POU5F1	Gene Cards
HIP1	Gene Cards
ADRB2	Gene Cards
TNFRSF8	Gene Cards	KEGG
MIR122	Gene Cards
PLCG2	Gene Cards
OPRM1	Gene Cards
AP4B1	Gene Cards
AHR	Gene Cards
PTH1R	Gene Cards
CSNK2B	Gene Cards
CLEC16A	Gene Cards
MKI67	Gene Cards
AGTR2	Gene Cards
NGFR	Gene Cards
HLA-DOB	Gene Cards
GSR	Gene Cards
CASP1	Gene Cards		GEO
HSPA8	Gene Cards
VIM	Gene Cards
IL3	Gene Cards
CYP2E1	Gene Cards
CCR3	Gene Cards
DAG1	Gene Cards
STX11	Gene Cards
MIR130A	Gene Cards
AHI1	Gene Cards
MIR181A1	Gene Cards
DNM1	Gene Cards
TLR1	Gene Cards	KEGG
SCN10A	Gene Cards
AQP4	Gene Cards
IL6-AS1	Gene Cards
RC3H1	Gene Cards
POLR1C	Gene Cards
MIR34C	Gene Cards
HARS1	Gene Cards
ITPR3	Gene Cards
LIF	Gene Cards
NOTCH4	Gene Cards
DNMT3B	Gene Cards
PROS1	Gene Cards
IGFBP3	Gene Cards
PWAR1	Gene Cards
MYH9	Gene Cards
ITGA2	Gene Cards		GEO
F12	Gene Cards
SERPINF2	Gene Cards
PIK3C2A	Gene Cards
CYP2C9	Gene Cards
NFKBIL1	Gene Cards
HTR2A	Gene Cards
STAT6	Gene Cards
IL3RA	Gene Cards
HSPG2	Gene Cards
EMSLR	Gene Cards
FMR1	Gene Cards
CASR	Gene Cards
BCL2L1	Gene Cards
GGT1	Gene Cards
TACR3	Gene Cards
LYST	Gene Cards
NLGN3	Gene Cards
NCAM1	Gene Cards
AARS1	Gene Cards
CD81	Gene Cards
CAMP	Gene Cards
GTF2IRD1	Gene Cards
ACP1	Gene Cards
GUSB	Gene Cards
NT5E	Gene Cards
CARD9	Gene Cards
HP	Gene Cards
SYP	Gene Cards
TCF3	Gene Cards
TNNT2	Gene Cards
LTB	Gene Cards
GATA1	Gene Cards
RAC2	Gene Cards
TSPO	Gene Cards
CDH2	Gene Cards
SCN9A	Gene Cards
PRKAR1A	Gene Cards
MIR183	Gene Cards
RAD51	Gene Cards
MIR18A	Gene Cards
DSG3	Gene Cards
DHFR	Gene Cards
CYP11A1	Gene Cards
MIR379	Gene Cards
AMH	Gene Cards
DPP4	Gene Cards
MIR22	Gene Cards
SLC11A1	Gene Cards
PRKDC	Gene Cards
AGRN	Gene Cards
MT-CYB	Gene Cards
BRD2	Gene Cards
MIR92A1	Gene Cards
CXCR2	Gene Cards
TET3	Gene Cards
SNORD15A	Gene Cards
KCNH2	Gene Cards
SLC1A2	Gene Cards
TCF4	Gene Cards
ABCC2	Gene Cards
AQP1	Gene Cards
EIF2AK2	Gene Cards		GEO
TRPC6	Gene Cards
REL	Gene Cards
SEPSECS	Gene Cards
TAPBP	Gene Cards
TNFSF15	Gene Cards	KEGG
TERC	Gene Cards
HNRNPA2B1	Gene Cards
SMO	Gene Cards
TUBB	Gene Cards
KIR3DL1	Gene Cards
PRKCB	Gene Cards
THPO	Gene Cards
MLN	Gene Cards
TNFRSF6B	Gene Cards	KEGG
F10	Gene Cards
DST	Gene Cards
ADRB1	Gene Cards
PTTG1	Gene Cards
CD2	Gene Cards
CD226	Gene Cards
TGIF1	Gene Cards
PPP2CA	Gene Cards
CYP27B1	Gene Cards
CRKL	Gene Cards
OPTN	Gene Cards
IGHMBP2	Gene Cards
XIAP	Gene Cards
MB	Gene Cards
ITGA4	Gene Cards
AMPD2	Gene Cards
TRAF3	Gene Cards
BCL2L11	Gene Cards
BACH2	Gene Cards
PECAM1	Gene Cards
F2RL1	Gene Cards
BBS12	Gene Cards
TPI1	Gene Cards
HLA-DRB3	Gene Cards
COL5A1	Gene Cards
MIR15A	Gene Cards
PTPN2	Gene Cards
RPS26	Gene Cards
GLS	Gene Cards
TYROBP	Gene Cards
FHL1	Gene Cards
MBD4	Gene Cards
MIR106A	Gene Cards
ABCC1	Gene Cards
MPL	Gene Cards
ATXN1	Gene Cards
IL24	Gene Cards
DLL1	Gene Cards
RAB11FIP5	Gene Cards
PRKACA	Gene Cards
COMP	Gene Cards
MIR205	Gene Cards
PCSK9	Gene Cards
DAXX	Gene Cards
HSPB1	Gene Cards
DGUOK	Gene Cards
DNM1L	Gene Cards
PTHLH	Gene Cards
GRIN2A	Gene Cards
MASP1	Gene Cards
TG	Gene Cards
TP63	Gene Cards
MIRLET7D	Gene Cards
HTR3A	Gene Cards
FSHR	Gene Cards
ALOX5	Gene Cards
MIR124-1	Gene Cards
GP1BA	Gene Cards
IL12RB2	Gene Cards
THBS1	Gene Cards
SLC29A3	Gene Cards
CISH	Gene Cards
ACVRL1	Gene Cards
DNM2	Gene Cards
CHRM3	Gene Cards
NOTCH2	Gene Cards
MIR224	Gene Cards
GNB5	Gene Cards
C9orf72	Gene Cards		GEO
MIR186	Gene Cards
ABCC6	Gene Cards
OXT	Gene Cards
GLI3	Gene Cards
TRADD	Gene Cards
TMEM94	Gene Cards
MIR29C	Gene Cards
PTGS1	Gene Cards
CD24	Gene Cards
ANXA6	Gene Cards
EHMT2	Gene Cards
XRCC4	Gene Cards
ARG1	Gene Cards
DYRK1A	Gene Cards
STUB1	Gene Cards
IRAK4	Gene Cards
AFP	Gene Cards
FOXF1	Gene Cards
HDAC1	Gene Cards
NFKB2	Gene Cards
KIF5A	Gene Cards
ATP12A	Gene Cards
ACAN	Gene Cards
MUC1	Gene Cards
MSX1	Gene Cards
FBN2	Gene Cards
IRGM	Gene Cards
TIRAP	Gene Cards
GCG	Gene Cards
AKT3	Gene Cards
LINC02694	Gene Cards
NFATC2	Gene Cards
CASP9	Gene Cards
DSG1	Gene Cards
MFGE8	Gene Cards
HSPA5	Gene Cards
SLC17A5	Gene Cards
EZR	Gene Cards
TYRO3	Gene Cards
CALB1	Gene Cards
HADHA	Gene Cards
MITF	Gene Cards
NAMPT	Gene Cards
CRYAA	Gene Cards
IL17RA	Gene Cards
TYMS	Gene Cards
FGB	Gene Cards
TEK	Gene Cards
ADGRG1	Gene Cards
TMPO	Gene Cards
TSEN54	Gene Cards
TNFRSF18	Gene Cards	KEGG
CDK1	Gene Cards
EMD	Gene Cards
TRAF2	Gene Cards
GPT	Gene Cards
MIR193A	Gene Cards
MIR16-1	Gene Cards
PDPN	Gene Cards
CGA	Gene Cards
RPS10	Gene Cards
BCHE	Gene Cards
LIMK1	Gene Cards
BAG6	Gene Cards
MT-ND5	Gene Cards
STK11	Gene Cards
MT-TK	Gene Cards
PTK2	Gene Cards
CFHR1	Gene Cards
MBD2	Gene Cards
PRLR	Gene Cards
MIR101-1	Gene Cards
MAGT1	Gene Cards
STAT2	Gene Cards
CDH23	Gene Cards
DDX6	Gene Cards
TRE-TTC3-1	Gene Cards
CCAT1	Gene Cards
MAP3K7	Gene Cards
TSBP1	Gene Cards
CYP2U1	Gene Cards
PRDX5	Gene Cards
MIR133B	Gene Cards
RXRA	Gene Cards
CD163	Gene Cards
IGHE	Gene Cards
SPI1	Gene Cards
NPHS1	Gene Cards
TCOF1	Gene Cards
MIR144	Gene Cards
PPBP	Gene Cards
PTK2B	Gene Cards
SHBG	Gene Cards
SHOC2	Gene Cards
RAB27A	Gene Cards
PTH	Gene Cards
ATG7	Gene Cards
UCP2	Gene Cards
CTSB	Gene Cards
ACADVL	Gene Cards
KMT2A	Gene Cards
FANCE	Gene Cards
MIR409	Gene Cards
PRKCA	Gene Cards
MS4A1	Gene Cards
RPL5	Gene Cards
EFNA2	Gene Cards
HLA-DRB6	Gene Cards
RERE	Gene Cards
RARA	Gene Cards
DOCK11	Gene Cards
C8B	Gene Cards
FLG	Gene Cards
MAF	Gene Cards
EIF2AK3	Gene Cards
SCO2	Gene Cards
ITGB4	Gene Cards
VARS1	Gene Cards
PSORS1C1	Gene Cards
GPSM3	Gene Cards
ZEB1	Gene Cards
MIR30B	Gene Cards
COL11A2	Gene Cards
CDK2	Gene Cards
EIF2B4	Gene Cards
HOXD13	Gene Cards
STAT5B	Gene Cards
MAP2	Gene Cards
F11	Gene Cards
PBX1	Gene Cards
PTPN6	Gene Cards
PROP1	Gene Cards
PRRC2A	Gene Cards
WAKMAR2	Gene Cards
SOCS2	Gene Cards
KISS1R	Gene Cards
MIR29B1	Gene Cards
FCN1	Gene Cards
DEFB4A	Gene Cards
DLEU2	Gene Cards
PGM3	Gene Cards
ALAD	Gene Cards
IFNGR2	Gene Cards
DCLRE1C	Gene Cards
MIR23B	Gene Cards
PDHB	Gene Cards
ITK	Gene Cards
E2F1	Gene Cards
VEGFC	Gene Cards
POLB	Gene Cards
HSPA1L	Gene Cards
MTRR	Gene Cards
ABCA4	Gene Cards
NEB	Gene Cards
KRT1	Gene Cards
COG6	Gene Cards
RNASEL	Gene Cards
ADD1	Gene Cards
SUMO1	Gene Cards
DDAH2	Gene Cards
IGFBP2	Gene Cards
ANG	Gene Cards
POLR3B	Gene Cards
CFLAR	Gene Cards
EVL	Gene Cards
STIM1	Gene Cards
COL5A2	Gene Cards
MIR199A1	Gene Cards
GAST	Gene Cards
TIA1	Gene Cards
FBXW7	Gene Cards
PINX1	Gene Cards
MIR181A2	Gene Cards
POLR3A	Gene Cards
PGR	Gene Cards
DHX16	Gene Cards
MIR151A	Gene Cards
LAT	Gene Cards
HLA-F	Gene Cards
C8A	Gene Cards
AKT2	Gene Cards
CFHR2	Gene Cards
MIRLET7G	Gene Cards
IL36RN	Gene Cards
MPIG6B	Gene Cards
DDX39B	Gene Cards
LOC117038795	Gene Cards
ADRB3	Gene Cards
LSM11	Gene Cards
SEMA7A	Gene Cards
MIR26B	Gene Cards
BAK1	Gene Cards
LGALS1	Gene Cards
H3C14	Gene Cards
PDCD1LG2	Gene Cards	KEGG
PAX5	Gene Cards
NMNAT2	Gene Cards
MICU1	Gene Cards
PDYN	Gene Cards
HNF1A	Gene Cards
PRKG1	Gene Cards
FCGR2C	Gene Cards
ITPR1	Gene Cards
EFEMP2	Gene Cards
IL18BP	Gene Cards
SAA1	Gene Cards
IGHM	Gene Cards
PTGER4	Gene Cards
STAR	Gene Cards	KEGG
ERAP1	Gene Cards
HCP5	Gene Cards
CYP2A6	Gene Cards
VARS2	Gene Cards
IL18R1	Gene Cards
MIR24-1	Gene Cards
HLA-E	Gene Cards
CDKN2C	Gene Cards
CTSA	Gene Cards
CYP21A1P	Gene Cards
BANCR	Gene Cards
MIR499A	Gene Cards
PTGDS	Gene Cards
MEG8	Gene Cards
SLIT2	Gene Cards
MIR27B	Gene Cards
F2R	Gene Cards
NPM1	Gene Cards
COG2	Gene Cards
NLRC4	Gene Cards
IL15RA	Gene Cards
COL7A1	Gene Cards
FIP1L1	Gene Cards
UNC93B1	Gene Cards
QDPR	Gene Cards
NKX2-2	Gene Cards
CSNK2A1	Gene Cards
HDAC6	Gene Cards
CYP24A1	Gene Cards
FBL	Gene Cards
ANKS1A	Gene Cards
SERPINB2	Gene Cards
TIMP2	Gene Cards
DCTN4	Gene Cards
CCHCR1	Gene Cards
GPX4	Gene Cards
ELF1	Gene Cards
IL36A	Gene Cards
DPYSL5	Gene Cards
RXRB	Gene Cards
ETV6	Gene Cards
MIR192	Gene Cards
ARID5B	Gene Cards
PARK7	Gene Cards
CNTNAP2	Gene Cards
TPI1P2	Gene Cards
SOX11	Gene Cards
TRB	Gene Cards
DKK1	Gene Cards
RPS20	Gene Cards
CAMK2G	Gene Cards
GATA2	Gene Cards
GRB10	Gene Cards
ERG	Gene Cards
COLEC11	Gene Cards
IAPP	Gene Cards
KIR2DS2	Gene Cards
DKC1	Gene Cards
UBC	Gene Cards
NR1H3	Gene Cards
LRP2	Gene Cards
TRPM4	Gene Cards
PLCG1	Gene Cards
RAD50	Gene Cards
MDC1	Gene Cards
TP53BP1	Gene Cards
CD1D	Gene Cards
MUSK	Gene Cards
LMAN1	Gene Cards
PON3	Gene Cards
ANGPT1	Gene Cards
KIR2DS1	Gene Cards
CARD11	Gene Cards
NIN	Gene Cards
EPHB2	Gene Cards
MIR590	Gene Cards
WNT3	Gene Cards
SCT	Gene Cards
KDM4C	Gene Cards
ATF6B	Gene Cards
GAD1	Gene Cards
SLC39A8	Gene Cards
MIR3936HG	Gene Cards
GRIA2	Gene Cards
NR1H4	Gene Cards
AHSG	Gene Cards
KAT6B	Gene Cards
UCA1	Gene Cards
LAMP1	Gene Cards
ZFP57	Gene Cards
COL18A1	Gene Cards
PPARD	Gene Cards
NRIP1	Gene Cards
CLEC4D	Gene Cards
POLR1HASP	Gene Cards
CLIC1	Gene Cards
CBLB	Gene Cards
MC1R	Gene Cards
BRD4	Gene Cards
ITPA	Gene Cards
ERCC3	Gene Cards
PCAT1	Gene Cards
PLEC	Gene Cards
PPT2	Gene Cards
HSD3B2	Gene Cards
DPF2	Gene Cards
LOC126805994	Gene Cards
SCUBE3	Gene Cards
AMPH	Gene Cards
CXCL11	Gene Cards
SP1	Gene Cards
KISS1	Gene Cards
CNBP	Gene Cards
PTN	Gene Cards
IL11	Gene Cards
TACR1	Gene Cards
RPS18	Gene Cards
IL27	Gene Cards
RORC	Gene Cards
NAA10	Gene Cards
CCL21	Gene Cards
DHCR7	Gene Cards
MAP3K14	Gene Cards
AFF1	Gene Cards
CDK6	Gene Cards
HINT1	Gene Cards
VKORC1	Gene Cards
CCL22	Gene Cards
RPA1	Gene Cards
MIR19B1	Gene Cards
APAF1	Gene Cards
VDAC1	Gene Cards
GTF2H4	Gene Cards
MIR501	Gene Cards
MIRLET7I	Gene Cards
RNU7-1	Gene Cards
MIR215	Gene Cards
EIF4G1	Gene Cards
PLA2G2A	Gene Cards
ADSL	Gene Cards
LGALS9	Gene Cards
MIR196A1	Gene Cards
ARF1	Gene Cards
CD74	Gene Cards		GEO
PDE4A	Gene Cards
P2RY12	Gene Cards
PLA2G7	Gene Cards
CRBN	Gene Cards
TBXT	Gene Cards
IGH	Gene Cards
SLC2A4	Gene Cards
LEMD3	Gene Cards
RECK	Gene Cards
PVALB	Gene Cards
PAPPA	Gene Cards
TCF7	Gene Cards
TBL1XR1	Gene Cards
DUSP22	Gene Cards
IKBKE	Gene Cards
LOC110806262	Gene Cards
NUP133	Gene Cards
SEMA4A	Gene Cards
FLNC-AS1	Gene Cards
ALDH2	Gene Cards
MIR152	Gene Cards
SLC26A4	Gene Cards
OGG1	Gene Cards
COL17A1	Gene Cards
SKP1	Gene Cards
ENTPD1	Gene Cards
FTL	Gene Cards
EFNA5	Gene Cards
GPANK1	Gene Cards
RYR2	Gene Cards
XRCC3	Gene Cards
CFHR3	Gene Cards
RPL11	Gene Cards
ADARB1	Gene Cards	KEGG
KIR2DL3	Gene Cards
PRODH	Gene Cards
TREH	Gene Cards
USP7	Gene Cards
LAMP2	Gene Cards
CRHR1	Gene Cards
SOCS6	Gene Cards
MIR26A1	Gene Cards
HYCC1	Gene Cards
TPP2	Gene Cards
RFX1	Gene Cards
NUP85	Gene Cards
CAST	Gene Cards
GABRA1	Gene Cards
ZNF423	Gene Cards	KEGG
HDAC9	Gene Cards		GEO
KIR2DL1	Gene Cards
PROC	Gene Cards
RARRES2	Gene Cards
GSX2	Gene Cards
BPI	Gene Cards
EYS	Gene Cards
SLC19A1	Gene Cards
AGPAT1	Gene Cards
SLC39A7	Gene Cards
ATP6V1G2	Gene Cards
SIAE	Gene Cards
NR0B1	Gene Cards
NUP107	Gene Cards
USH2A	Gene Cards
EIF4H	Gene Cards
TRIP11	Gene Cards
ATP1A1	Gene Cards
LRP1	Gene Cards
TRIM39	Gene Cards
PSORS1C2	Gene Cards
G3BP1	Gene Cards
NR5A1	Gene Cards
APLNR	Gene Cards
FEN1	Gene Cards
RDX	Gene Cards
DEF6	Gene Cards
STK19	Gene Cards
FH	Gene Cards
MAN2B1	Gene Cards
PLXND1	Gene Cards
IFI44L			GEO
IFI44			GEO
CMPK2			GEO
TRABD			GEO
AURKAIP1			GEO
LAMP3			GEO
LY6E			GEO
IFI6			GEO
TYMP			GEO
HCFC1R1			GEO
PLSCR1			GEO
RSAD2			GEO
NAPA			GEO
OAS3			GEO
SV2B			GEO
HERC5			GEO
ASNA1			GEO
IFI35			GEO
XAF1			GEO
PARP9			GEO
USP5			GEO
SPATS2L			GEO
IFI27			GEO
HERC6			GEO
OASL			GEO
PFN1			GEO
C8G			GEO
MT1HL1			GEO
ARHGAP22			GEO
CACTIN			GEO
PTPRCAP			GEO
AKT1S1			GEO
AKAP2			GEO
BTNL9			GEO
SP100			GEO
SLC38A5			GEO
UBA1			GEO
HSH2D			GEO
LARP1			GEO
COPE			GEO
ST6GAL2			GEO
UBALD2			GEO
GNAI2			GEO
SAMD9L			GEO
LGI4			GEO
LINC00643			GEO
MAP2K2			GEO
DRAP1			GEO
OAS2			GEO
ZER1			GEO
DCXR			GEO
SIX3			GEO
IFIT5			GEO
LOC105274304			GEO
P2RY11			GEO
RAPH1			GEO
LAP3			GEO
DLGAP1			GEO
NAT14			GEO
TRIM22			GEO
AKAP5			GEO
SPEN			GEO
GTPBP1			GEO
SRCAP			GEO
DGKZ			GEO
ADCY7			GEO
ZNF620			GEO
SP110			GEO
ACAP1			GEO
RGS3			GEO
MEIOC			GEO
IKZF4			GEO
ODF3B			GEO
PGAP1			GEO
FBXO6			GEO
ANKS6			GEO
PARP3			GEO
EMP3			GEO
VAMP2			GEO
LOC101929315			GEO
SBNO2			GEO
LIME1			GEO
PRKD2			GEO
FAM13A			GEO
PAK3			GEO
NEXN			GEO
GPR158			GEO
TMEM50B			GEO
PKP3			GEO
CNTNAP3P2			GEO
RRP9			GEO
ACTBP9			GEO
PHF21B			GEO
S100P			GEO
CD37			GEO
DDX60L			GEO
TOR3A			GEO
UHRF1BP1			GEO
PARP10			GEO
CBR4			GEO
RAB11FIP1			GEO
LOC283045			GEO
N4BP1			GEO
TADA3			GEO
MRPL38			GEO
f66			GEO
PPP2R1A			GEO
SNCAIP			GEO
KLHDC7B			GEO
ELL2			GEO
RAB5C			GEO
CLEC11A			GEO
KLF16			GEO
GDF11			GEO
LOC388882			GEO
GS1-24F4.2			GEO
AES			GEO
NAPB			GEO
CFAP43			GEO
CCL13			GEO
ZBP1			GEO
MT1X			GEO
HAP1			GEO
RALGAPA1			GEO
SRF			GEO
TPCN1			GEO
N4BP2L2-IT2			GEO
RANGAP1			GEO
METTL7A			GEO
KLF13			GEO
SYNGR2			GEO
ALDOA			GEO
LOC101928813			GEO
BANF1			GEO
FERMT3			GEO
NELFB			GEO
TUSC3			GEO
DEPTOR			GEO
ARHGDIA			GEO
TRRAP			GEO
B4GALT3			GEO
MTHFD1L			GEO
SLC4A5			GEO
FMNL1			GEO
ATP6V0C			GEO
GAS2L1			GEO
