# Supplementary material for: The potential mechanism of Huangqin for treatment of systemic lupus erythematosus based on network pharmacology, molecular docking and molecular dynamics simulation
Source: PeerJ. 2025 Jun 26;13:e19536. doi: 10.7717/peerj.19536 (PMC12206403; doi:10.7717/peerj.19536)
Supplement: Supplemental Information 3 [file peerj-13-19536-s003.xlsx]

## Sheet: Sheet1
Supplementary Table S3 PPI network of key targets
No	node_name	Degree
1	IL6	44
2	CASP3	38
3	BCL2	38
4	ESR1	38
5	FOS	36
6	HIF1A	38
7	CCND1	36
8	ESR2	34
9	PPARG	38
10	CASP8	30
11	RELA	34
12	CASP9	26
13	AR	28
14	CYCS	24
15	PGR	28
16	IGF2	24
17	PRKCA	24
18	PLAU	26
19	PTGS1	22
20	ACHE	14
21	TP63	8
22	AHR	8
23	PON1	8
24	COL18A1	6
25	F7	6
26	CYP2C9	6
27	CHRM3	4
28	GABRA1	2
