# Supplementary material for: The potential mechanism of Huangqin for treatment of systemic lupus erythematosus based on network pharmacology, molecular docking and molecular dynamics simulation
Source: PeerJ. 2025 Jun 26;13:e19536. doi: 10.7717/peerj.19536 (PMC12206403; doi:10.7717/peerj.19536)
Supplement: Supplemental Information 4 [file peerj-13-19536-s004.xlsx]

## Sheet: Sheet1
Supplementary Table S4 BP, CC, and MF from GO enrichment analysis.
Ontology	pathway	ID	Count	Gene ratio%	PValue
BP	positive regulation of transcription from RNA polymerase II promoter	GO:0045944	13	46.4286	2.81818e-08
BP	response to estradiol	GO:0032355	6	21.4286	2.51725e-07
BP	positive regulation of transcription, DNA-templated	GO:0045893	10	35.7143	3.50388e-07
BP	intracellular steroid hormone receptor signaling pathway	GO:0030518	4	14.2857	6.75662e-07
BP	positive regulation of pri-miRNA transcription from RNA polymerase II promoter	GO:1902895	5	17.8571	8.22509e-07
BP	response to xenobiotic stimulus	GO:0009410	7	25	1.81788e-06
BP	mammary gland alveolus development	GO:0060749	4	14.2857	1.91886e-06
BP	response to hypoxia	GO:0001666	6	21.4286	3.93423e-06
BP	neuron apoptotic process	GO:0051402	5	17.8571	4.77985e-06
BP	negative regulation of pri-miRNA transcription from RNA polymerase II promoter	GO:1902894	4	14.2857	6.82122e-06
BP	response to cobalt ion	GO:0032025	3	10.7143	2.77325e-05
BP	cellular response to hypoxia	GO:0071456	5	17.8571	3.34055e-05
BP	negative regulation of transcription from RNA polymerase II promoter	GO:0000122	9	32.1429	4.9101e-05
BP	regulation of transcription from RNA polymerase II promoter	GO:0006357	11	39.2857	6.36884e-05
BP	positive regulation of gene expression	GO:0010628	7	25	6.43426e-05
BP	positive regulation of apoptotic process	GO:0043065	6	21.4286	8.81247e-05
BP	response to estrogen	GO:0043627	4	14.2857	8.95744e-05
BP	apoptotic process	GO:0006915	7	25	0.000169398
BP	response to toxic substance	GO:0009636	4	14.2857	0.000189276
BP	response to iron ion	GO:0010039	3	10.7143	0.000249083
BP	signal transduction	GO:0007165	9	32.1429	0.000284806
BP	epithelial cell apoptotic process	GO:1904019	3	10.7143	0.000312649
BP	activation of cysteine-type endopeptidase activity	GO:0097202	3	10.7143	0.00034709
BP	intracellular estrogen receptor signaling pathway	GO:0030520	3	10.7143	0.000421267
BP	cellular response to estrogen stimulus	GO:0071391	3	10.7143	0.000421267
BP	positive regulation of sequence-specific DNA binding transcription factor activity	GO:0051091	4	14.2857	0.000572234
BP	response to amino acid	GO:0043200	3	10.7143	0.000685815
BP	cellular response to DNA damage stimulus	GO:0006974	5	17.8571	0.000717234
BP	positive regulation of cell proliferation	GO:0008284	6	21.4286	0.000820728
BP	positive regulation of vascular endothelial growth factor production	GO:0010575	3	10.7143	0.000841498
BP	response to antibiotic	GO:0046677	3	10.7143	0.000896831
BP	negative regulation of gene expression	GO:0010629	5	17.8571	0.000924492
BP	response to lipopolysaccharide	GO:0032496	4	14.2857	0.0011256
BP	intrinsic apoptotic signaling pathway	GO:0097193	3	10.7143	0.00119907
BP	protein maturation	GO:0051604	3	10.7143	0.00140072
BP	response to cold	GO:0009409	3	10.7143	0.00161745
BP	lactation	GO:0007595	3	10.7143	0.00161745
BP	positive regulation of MAPK cascade	GO:0043410	4	14.2857	0.00169971
BP	positive regulation of blood vessel endothelial cell migration	GO:0043536	3	10.7143	0.00209568
BP	response to cytokine	GO:0034097	3	10.7143	0.00209568
CC	macromolecular complex	GO:0032991	9	32.1429	2.03556e-06
CC	chromatin	GO:0000785	10	35.7143	7.16224e-06
CC	caspase complex	GO:0008303	3	10.7143	4.58879e-05
CC	nucleoplasm	GO:0005654	15	53.5714	0.000195694
CC	transcription factor complex	GO:0005667	5	17.8571	0.000229906
CC	nucleus	GO:0005634	18	64.2857	0.000323169
CC	cytoplasm	GO:0005737	17	60.7143	0.000641834
CC	apoptosome	GO:0043293	2	7.14286	0.00391815
MF	transcription coactivator binding	GO:0001223	6	21.4286	6.48578e-09
MF	RNA polymerase II transcription factor activity, ligand-activated sequence-specific DNA binding	GO:0004879	6	21.4286	1.19094e-08
MF	enzyme binding	GO:0019899	9	32.1429	4.33215e-08
MF	transcription factor activity, sequence-specific DNA binding	GO:0003700	10	35.7143	1.00998e-07
MF	sequence-specific DNA binding	GO:0043565	8	28.5714	3.94702e-07
MF	estrogen response element binding	GO:0034056	4	14.2857	4.21245e-07
MF	steroid binding	GO:0005496	4	14.2857	1.01799e-05
MF	transcription regulatory region sequence-specific DNA binding	GO:0000976	6	21.4286	1.92184e-05
MF	RNA polymerase II transcription factor activity, sequence-specific DNA binding	GO:0000981	10	35.7143	4.51395e-05
MF	transcriptional activator activity, RNA polymerase II transcription regulatory region sequence-specific binding	GO:0001228	7	25	4.96418e-05
MF	cysteine-type endopeptidase activity involved in apoptotic process	GO:0097153	3	10.7143	8.7201e-05
MF	cysteine-type endopeptidase activity involved in apoptotic signaling pathway	GO:0097199	3	10.7143	0.000106485
MF	cysteine-type endopeptidase activity involved in execution phase of apoptosis	GO:0097200	3	10.7143	0.00012767
MF	RNA polymerase II core promoter proximal region sequence-specific DNA binding	GO:0000978	9	32.1429	0.000213511
MF	DNA binding	GO:0003677	9	32.1429	0.00039465
MF	identical protein binding	GO:0042802	10	35.7143	0.000450192
MF	steroid hormone receptor activity	GO:0003707	3	10.7143	0.000484697
MF	chromatin binding	GO:0003682	6	21.4286	0.000611978
MF	transcription cofactor binding	GO:0001221	3	10.7143	0.00126034
MF	RNA polymerase II sequence-specific DNA binding transcription factor binding	GO:0061629	4	14.2857	0.00231738
MF	E-box binding	GO:0070888	3	10.7143	0.00328273
MF	protein homodimerization activity	GO:0042803	6	21.4286	0.00371128
MF	estrogen receptor activity	GO:0030284	2	7.14286	0.0056824
MF	protein kinase binding	GO:0019901	5	17.8571	0.00598042
MF	ATPase binding	GO:0051117	3	10.7143	0.0066263
MF	zinc ion binding	GO:0008270	6	21.4286	0.00760389
MF	protein binding	GO:0005515	25	89.2857	0.00835189
MF	cysteine-type endopeptidase activity	GO:0004197	3	10.7143	0.00869528
MF	peptidase activity	GO:0008233	3	10.7143	0.00973578
MF	ubiquitin protein ligase binding	GO:0031625	4	14.2857	0.00988058
