# Supplementary material for: The potential mechanism of Huangqin for treatment of systemic lupus erythematosus based on network pharmacology, molecular docking and molecular dynamics simulation
Source: PeerJ. 2025 Jun 26;13:e19536. doi: 10.7717/peerj.19536 (PMC12206403; doi:10.7717/peerj.19536)
Supplement: Supplemental Information 5 [file peerj-13-19536-s005.xlsx]

## Sheet: Sheet1
Supplementary Table S5 signaling pathways from KEGG enrichment analysis
pathway	ID	Count	PValue	Genes
Pathways in cancer	hsa05200	17	9.88995e-14	IGF2, PRKCA, FOS, HIF1A, ESR1, RELA, ESR2, VEGFA, CASP9, AR, IL6, CASP8, CCND1, CASP3, BCL2, CYCS, PPARG
Chemical carcinogenesis - receptor activation	hsa05207	11	2.40335e-10	AR, CCND1, BCL2, PGR, PRKCA, FOS, AHR, ESR1, RELA, ESR2, VEGFA
Lipid and atherosclerosis	hsa05417	11	2.76014e-10	CASP9, CYP2C9, IL6, CASP8, CASP3, BCL2, CYCS, PRKCA, PPARG, FOS, RELA
Kaposi sarcoma-associated herpesvirus infection	hsa05167	10	2.69742e-09	CASP9, IL6, CASP8, CCND1, CASP3, CYCS, FOS, HIF1A, RELA, VEGFA
Measles	hsa05162	9	4.22158e-09	CASP9, IL6, CASP8, CCND1, CASP3, BCL2, CYCS, FOS, RELA
Hepatitis B	hsa05161	9	1.50149e-08	CASP9, IL6, CASP8, CASP3, BCL2, CYCS, PRKCA, FOS, RELA
Human cytomegalovirus infection	hsa05163	9	1.94068e-07	CASP9, IL6, CASP8, CCND1, CASP3, CYCS, PRKCA, RELA, VEGFA
AGE-RAGE signaling pathway in diabetic complications	hsa04933	7	3.93489e-07	IL6, CCND1, CASP3, BCL2, PRKCA, RELA, VEGFA
Legionellosis	hsa05134	6	5.64011e-07	CASP9, IL6, CASP8, CASP3, CYCS, RELA
Epstein-Barr virus infection	hsa05169	8	1.54759e-06	CASP9, IL6, CASP8, CCND1, CASP3, BCL2, CYCS, RELA
Proteoglycans in cancer	hsa05205	8	1.70846e-06	CCND1, PLAU, CASP3, IGF2, PRKCA, HIF1A, ESR1, VEGFA
Human immunodeficiency virus 1 infection	hsa05170	8	2.13913e-06	CASP9, CASP8, CASP3, BCL2, CYCS, PRKCA, FOS, RELA
Apoptosis - multiple species	hsa04215	5	2.18431e-06	CASP9, CASP8, CASP3, BCL2, CYCS
p53 signaling pathway	hsa04115	6	2.29307e-06	CASP9, CASP8, CCND1, CASP3, BCL2, CYCS
Apoptosis	hsa04210	7	2.41388e-06	CASP9, CASP8, CASP3, BCL2, CYCS, FOS, RELA
Colorectal cancer	hsa05210	6	4.83798e-06	CASP9, CCND1, CASP3, BCL2, CYCS, FOS
Non-alcoholic fatty liver disease	hsa04932	7	5.16382e-06	IL6, CASP8, CASP3, CYCS, PPARG, FOS, RELA
Small cell lung cancer	hsa05222	6	6.74868e-06	CASP9, CCND1, CASP3, BCL2, CYCS, RELA
Prostate cancer	hsa05215	6	8.75453e-06	CASP9, AR, CCND1, PLAU, BCL2, RELA
Influenza A	hsa05164	7	9.1002e-06	CASP9, IL6, CASP8, CASP3, CYCS, PRKCA, RELA
Tuberculosis	hsa05152	7	1.22127e-05	CASP9, IL6, CASP8, CASP3, BCL2, CYCS, RELA
HIF-1 signaling pathway	hsa04066	6	1.54873e-05	IL6, BCL2, PRKCA, HIF1A, RELA, VEGFA
Toxoplasmosis	hsa05145	6	1.69211e-05	CASP9, CASP8, CASP3, BCL2, CYCS, RELA
Pathogenic Escherichia coli infection	hsa05130	7	2.10296e-05	CASP9, IL6, CASP8, CASP3, CYCS, FOS, RELA
Viral myocarditis	hsa05416	5	4.33498e-05	CASP9, CASP8, CCND1, CASP3, CYCS
Prolactin signaling pathway	hsa04917	5	5.15403e-05	CCND1, FOS, ESR1, RELA, ESR2
Pathways of neurodegeneration - multiple diseases	hsa05022	9	5.15899e-05	CASP9, CHRM3, IL6, CASP8, CASP3, BCL2, CYCS, PRKCA, RELA
Platinum drug resistance	hsa01524	5	6.08093e-05	CASP9, CASP8, CASP3, BCL2, CYCS
PI3K-Akt signaling pathway	hsa04151	8	6.66825e-05	CASP9, IL6, CCND1, BCL2, IGF2, PRKCA, RELA, VEGFA
Salmonella infection	hsa05132	7	7.62668e-05	IL6, CASP8, CASP3, BCL2, CYCS, FOS, RELA
Hepatitis C	hsa05160	6	9.23452e-05	CASP9, CASP8, CCND1, CASP3, CYCS, RELA
IL-17 signaling pathway	hsa04657	5	0.000163225	IL6, CASP8, CASP3, FOS, RELA
Endocrine resistance	hsa01522	5	0.000191777	CCND1, BCL2, FOS, ESR1, ESR2
MicroRNAs in cancer	hsa05206	7	0.000254142	CCND1, PLAU, CASP3, BCL2, PRKCA, TP63, VEGFA
Th17 cell differentiation	hsa04659	5	0.000278768	IL6, FOS, AHR, HIF1A, RELA
Cholinergic synapse	hsa04725	5	0.000331528	ACHE, CHRM3, BCL2, PRKCA, FOS
TNF signaling pathway	hsa04668	5	0.000342883	IL6, CASP8, CASP3, FOS, RELA
Thyroid hormone signaling pathway	hsa04919	5	0.000430341	CASP9, CCND1, PRKCA, HIF1A, ESR1
Estrogen signaling pathway	hsa04915	5	0.000688546	BCL2, PGR, FOS, ESR1, ESR2
Alcoholic liver disease	hsa04936	5	0.000787867	IL6, CASP8, CCND1, CASP3, RELA
Alzheimer disease	hsa05010	7	0.000797839	CASP9, CHRM3, IL6, CASP8, CASP3, CYCS, RELA
Breast cancer	hsa05224	5	0.000896956	CCND1, PGR, FOS, ESR1, ESR2
Cytosolic DNA-sensing pathway	hsa04623	4	0.00141321	IL6, CASP8, CASP3, RELA
Pertussis	hsa05133	4	0.00146836	IL6, CASP3, FOS, RELA
Pancreatic cancer	hsa05212	4	0.00146836	CASP9, CCND1, RELA, VEGFA
EGFR tyrosine kinase inhibitor resistance	hsa01521	4	0.00164189	IL6, BCL2, PRKCA, VEGFA
MAPK signaling pathway	hsa04010	6	0.00178335	CASP3, IGF2, PRKCA, FOS, RELA, VEGFA
Chagas disease	hsa05142	4	0.00340542	IL6, CASP8, FOS, RELA
Amoebiasis	hsa05146	4	0.00340542	IL6, CASP3, PRKCA, RELA
Herpes simplex virus 1 infection	hsa05168	7	0.00348899	CASP9, IL6, CASP8, CASP3, BCL2, CYCS, RELA
Toll-like receptor signaling pathway	hsa04620	4	0.00400111	IL6, CASP8, FOS, RELA
Chemical carcinogenesis - reactive oxygen species	hsa05208	5	0.00412546	FOS, AHR, HIF1A, RELA, VEGFA
Serotonergic synapse	hsa04726	4	0.00477203	CYP2C9, CASP3, PRKCA, PTGS1
Relaxin signaling pathway	hsa04926	4	0.00656967	PRKCA, FOS, RELA, VEGFA
Fluid shear stress and atherosclerosis	hsa05418	4	0.00807105	BCL2, FOS, RELA, VEGFA
Huntington disease	hsa05016	5	0.0124388	CASP9, CASP8, CASP3, CYCS, PPARG
VEGF signaling pathway	hsa04370	3	0.0133999	CASP9, PRKCA, VEGFA
Human papillomavirus infection	hsa05165	5	0.0162072	CASP8, CCND1, CASP3, RELA, VEGFA
NOD-like receptor signaling pathway	hsa04621	4	0.0177153	IL6, CASP8, BCL2, RELA
Transcriptional misregulation in cancer	hsa05202	4	0.0195309	IL6, PLAU, PPARG, RELA
Non-small cell lung cancer	hsa05223	3	0.0195456	CASP9, CCND1, PRKCA
Focal adhesion	hsa04510	4	0.0222988	CCND1, BCL2, PRKCA, VEGFA
Viral carcinogenesis	hsa05203	4	0.0225869	CASP8, CCND1, CASP3, RELA
Human T-cell leukemia virus 1 infection	hsa05166	4	0.0281252	IL6, CCND1, FOS, RELA
PD-L1 expression and PD-1 checkpoint pathway in cancer	hsa05235	3	0.0290275	FOS, HIF1A, RELA
Rheumatoid arthritis	hsa05323	3	0.0314798	IL6, FOS, VEGFA
Coronavirus disease - COVID-19	hsa05171	4	0.0314905	IL6, PRKCA, FOS, RELA
Ras signaling pathway	hsa04014	4	0.0328942	IGF2, PRKCA, RELA, VEGFA
Choline metabolism in cancer	hsa05231	3	0.0346571	PRKCA, FOS, HIF1A
NF-kappa B signaling pathway	hsa04064	3	0.0386287	PLAU, BCL2, RELA
C-type lectin receptor signaling pathway	hsa04625	3	0.0386287	IL6, CASP8, RELA
Parathyroid hormone synthesis, secretion and action	hsa04928	3	0.0399899	BCL2, PRKCA, FOS
Prion disease	hsa05020	4	0.0469904	CASP9, IL6, CASP3, CYCS
Sphingolipid signaling pathway	hsa04071	3	0.050764	BCL2, PRKCA, RELA
Osteoclast differentiation	hsa04380	3	0.0616568	PPARG, FOS, RELA
Yersinia infection	hsa05135	3	0.0632741	IL6, FOS, RELA
Oxytocin signaling pathway	hsa04921	3	0.0775898	CCND1, PRKCA, FOS
Efferocytosis	hsa04148	3	0.0793373	CASP3, PPARG, HIF1A
Cellular senescence	hsa04218	3	0.0793373	IL6, CCND1, RELA
Antifolate resistance	hsa01523	2	0.0865477	IL6, RELA
JAK-STAT signaling pathway	hsa04630	3	0.0882607	IL6, CCND1, BCL2
Hepatocellular carcinoma	hsa05225	3	0.0900811	CCND1, IGF2, PRKCA
Amyotrophic lateral sclerosis	hsa05014	4	0.0942857	CASP9, CASP3, BCL2, CYCS
